# Supplementary material for: Targeting the MIF/CXCR7/AKT Signaling Pathway in Castration-Resistant Prostate Cancer
Source: Oxford University Press journal article supplement (doi:10.1158/1541-7786.mcr-18-0412), 2018-09-17
Supplement: 15417786mcr180412-sup-200773_2_supp_4989580_pk3r7k.xlsx [file 15417786mcr180412-sup-200773_2_supp_4989580_pk3r7k.xlsx]

## Sheet: Table S1
siRNAs
Name	Company	Sequence
Control siRNA	Qiagen	Cat # SI03650318
siCXCR7 a	Qiagen	CCUACUACCUGAAGACCGU
siCXCR7 b	Qiagen	CACTATTGGTGTACCTTATAA
siMIF a	Sigma	GCGCAGAACCGCUCCUACA
siMIF b	Sigma	CGGUGCACGUGGUCCCGGA
RT-qPCR primers
Name		Sequence
CXCR7	Forward	GAGGCTCCTTTCTGCAGTGT
CXCR7	Reverse	CGGGCAATCAAATGACCTCC
MIF	Forward	GAAGGCCATGAGCTGGTC
MIF	Reverse	GGTTCCTCTCCGAGCTCAC
AURKA	Forward	TTTGGGTGGTCAGTACATGCTC
AURKA	Reverse	AAGAACTCCAAGGCTCCAGAGA
CDC6	Forward	GGGAATCAGAGGCTCAGAAG
CDC6	Reverse	CACTGGATGTTTGCAGGAGA
CDC45	Forward	CGCATGGTTTGCTCCACTAT
CDC45	Reverse	GGGATGAAGAGGAGGATGAA
CDK1	Forward	AGAAAGTGAAGAGGAAGGGGTTC
CDK1	Reverse	CCATGTACTGACCAGGAGGGATA
E2F1	Forward	GGCCAGGTACTGATGGTCA
E2F1	Reverse	GACCCTGACCTGCTGCTCT
GAPDH	Forward	GTCATGGGTGTGAACCATGAGA
GAPDH	Reverse	GGTCATGAGTCCTTCCACGATAC
sgRNA sequnces
CXCR7 AR binding site KO
Name		Sequence
CXCR7 ARBS A1		TGCACTGTGGTCAAAGAATG
CXCR7 ARBS A2		GCATATTACAGCATTGACTG
CXCR7 ARBS B1		TCTGAAGATTATATACAGAC
CXCR7 ARBS B2		GCAGTGAATTCCACACCCTC
CXCR7 gene KO
Name		Sequence
CXCR7 KO - A		CAACAGCAGCGACTGCATCG
CXCR7 KO - B		CGGCATGATTGCCAACTCCG
CXCR7 KO - C		GACAACCCACAGGTCGGCAA
CXCR7 KO - D		TTTGCACGTGAGCTCGCCCA
PCR validation primers for ARBS KO
Name		Sequence
ARBS KO	Forward	TGCCAGAAATAAGTAGTCGT
ARBS KO	Reverse	CATCGCTCAGAATCTTGG
ChIP primers
Name		Sequence
CXCR7 ARBS	Forward	ATATTACAGCATTGACTGCGGC
CXCR7 ARBS	Reverse	TATCCCAAGCATCTTGCCGT
Control region	Forward	AATGCTGGGCTTCCAAGGA
Control region	Reverse	GACCTTGGTGACTGTTGAGGAAAC
Huamn Alu TaqMan PCR primersa and probe
Name		Sequence
Human Alu	Forward	GTCAGGAGATCGAGACCATCCT
Human Alu	Reverse	AGTGGCGCAATCTCGGC
Human Alu	Probe	5′-6-FAM-AGCTACTCGGGAGGCTGAGGCAGGA-TAMRA-3′.

## Sheet: Table S2
	On-target				Off-target 1				Off-target 2
	Sequence (5'-3')	Position	Amplication primers (5'-3')	Sanger sequencing primer (5'-3')	Sequence (5'-3')	Position	Amplication primers (5'-3')	Sanger sequencing primer (5'-3')	Sequence (5'-3')	Position	Amplication primers (5'-3')	Sanger sequencing primer (5'-3')
CXCR7 KO - A	CAACAGCAGCGACTGCATCG	chr2:236580528-236580547	F: AACCCAAACAGCTGAGCCTA	AACCCAAACAGCTGAGCCTA	TAAAAGCA[GTGACAGCATCG]	chr17:2853389-2853411	F: CAGAATTCCGCCTCGTTCCT	CAGAATTCCGCCTCGTTCCT	CCACAGCC[GCGGCCGCATCG]	chr2:106487422-106487444	F: CCTGACCTCTCTGAGCCTCT	CCTGACCTCTCTGAGCCTCT
			R: ACGGCGTACCATCTTCTTCC				R: CCTCCGCCTCGCATGG				R: GGAGCGCAGACCTTGGG
CXCR7 KO - B	CGGCATGATTGCCAACTCCG	chr2:236580636-236580655	F: AACCCAAACAGCTGAGCCTA	AACCCAAACAGCTGAGCCTA	AGGTATGT[CTGCCAACTCCG]	chr13:50444842-50444864	F: ACCAAGTGTATATAGGGATGGGT	ACCAAGTGTATATAGGGATGGGT	CGCCATGG[AGGCCAACTCCG]	chr4:786632-786654	F: GTGTCCAGGATGCTCTCGTC	GGGTCTCTTCTCCTTCTGG
			R: ACGGCGTACCATCTTCTTCC				R: TGACTTCATCTTGGACCCCG				R: AGCCCTCTCTCCTCTCAAGG
CXCR7 KO - C	GACAACCCACAGGTCGGCAA	chr2:236580728-236580747	F: AACCCAAACAGCTGAGCCTA	AACCCAAACAGCTGAGCCTA	GACAACCA[GCACGTCGGCAA]	chr9:93263508-93263530	F: AACGGATTGGCCTCACAACA	AACGGATTGGCCTCACAACA	GGAAACTC[ACAGGCCGGCAA]	chr12:6385992-6386014	F: GGACATGGAACTGGGACAGG	TGGGGGAGGAGGTATTCTGG
			R: ACGGCGTACCATCTTCTTCC				R: TTCAAGATGGTAAGCCGGGG				R: TGGGGGAGGAGGTATTCTGG
CXCR7 KO - D	TTTGCACGTGAGCTCGCCCA	chr2:236580800-236580819	F: AACCCAAACAGCTGAGCCTA	AACCCAAACAGCTGAGCCTA	TGTACATG[TGAACTCGCCCA]	chr3:32957218-32957240	F: TGCTATCTCTGTCCTTACAGCC	AGAGGGAAAGTTGATGCTGTC	TATGGAGG[TGAGCGCGCCCA]	chr3:139006089-139006111	F: TCGAGAGACACTCGCAGGAT	TCGAGAGACACTCGCAGGAT
			R: ACGGCGTACCATCTTCTTCC				R: TCTCCAAGTCCCCTATGGCAA				R: CACCTGACGTCCCACGTTATT
	On-target				Off-target 1				Off-target 2
	Sequence (5'-3')	Position	Amplication primers (5'-3')	Sanger sequencing primer (5'-3')	Sequence (5'-3')	Position	Amplication primers (5'-3')	Sanger sequencing primer (5'-3')	Sequence (5'-3')	Position	Amplication primers (5'-3')	Sanger sequencing primer (5'-3')
CXCR7 ARBS - A1	TGCACTGTGGTCAAAGAATG	chr2:236679833-236679855	F: TGCCAGAAATAAGTAGTCGT	AGTGGGTTGCAGTTACCGTG	AGCATTGT[GGTCAAAGAATG]	chr19:14604400-14604422	F: ACAGGAAGACCTTTCCGCTC	ACAGGAAGACCTTTCCGCTC	AATACTGT[GGTCAAAGAATG]	chr1:112087491-112087513	F: CAAAAGAGGGAGGCTCAGGG	TTGGGAGGTAGGAAAGGGGT
			R: CATCGCTCAGAATCTTG				R: GCAATGCCAATTGATGTTTGCTT				R: TTGGGAGGTAGGAAAGGGGT
CXCR7 ARBS - A2	GCATATTACAGCATTGACTG	chr2:236680025-236680047	F: TGCCAGAAATAAGTAGTCGT	AGTGGGTTGCAGTTACCGTG	GCTTCTTG[CAGCATTGACTG]	chr20:6064904-6064926	F: AACCTGCAAACTTCACAG	AACCTGCAAACTTCACAG	ACTTCTTG[CAGCATTGACTG]	chr14:75501493-75501515	F: TGGCCCGTCACCTTTTACAG	TGGCCCGTCACCTTTTACAG
			R: CATCGCTCAGAATCTTG				R: CACCTTAAACCCTCAAACC				R: GTCTGCAGGTCAAACCTCACTA
CXCR7 ARBS - B1	TCTGAAGATTATATACAGAC	chr2:236680455-236680477	F: TGCCAGAAATAAGTAGTCGT	AGTGGGTTGCAGTTACCGTG	GATAAAGA[TTATATACAGAC]	chr7:25512625-25512647	F: TGACAAACCCAGTGGGAGTA	ACCAGCTGTTTAGAGGAGTGC	GGAGAAGG[TTATATACAGAC]	chr2:218669442-218669464	F: TAATGGAAGAGCCAGCAGCC	TAATGGAAGAGCCAGCAGCC
			R: CATCGCTCAGAATCTTG				R: ACCAGCTGTTTAGAGGAGTGC				R: CTTGAGCCATGGAGACAGCA
CXCR7 ARBS - B2	GCAGTGAATTCCACACCCTC	chr2:236680421-236680443	F: TGCCAGAAATAAGTAGTCGT	AGTGGGTTGCAGTTACCGTG	GAAAAGAC[TTCCACACCCTC]	chr8:116819317-116819339	F: CTGAAACTGATGCCACTACAC	ATTCCTTGACCAATATCTCCC	TGGGTGAA[TCCCACACCCTC]	chr3:25577180-25577202	F: TGGCCGGCACATAACATTCT	TGGCCGGCACATAACATTCT
			R: CATCGCTCAGAATCTTG				R: ATTCCTTGACCAATATCTCCC				R: TTGCAGACCATCCCTGTCAC

## Sheet: Table S3
AR-repressed genes
GeneSymbol	Combined p value	logFC
CTBP1	4.82e-23	-0.918753
ST3GAL1	1.39e-22	-0.654531
MYLK	2.81e-21	-0.76804
EPHX1	5.39e-21	-0.601681
ANKRD16	3.28e-20	-0.680897
LOC145837	6.34e-20	-0.838217
CDH26	8.91e-20	-0.836734
HACL1	3.35e-19	-0.939992
SOX9	2.32e-16	-0.651465
CYB561A3	9.83e-16	-0.77655
NCOA7	2.24e-15	-1.23073
DDIT4	2.67e-15	-0.61589
GRB10	7.1e-15	-0.616173
ACKR3	8.32e-15	-0.780935
TK1	1.08e-14	-0.705509
PHGDH	2.19e-14	-0.625784
ST7-AS1	2.59e-14	-0.646343
BTD	2.78e-14	-0.670414
STK3	8.01e-14	-0.876067
ATP2B1	1.26e-13	-0.720585
EPS8	2.5e-13	-0.876151
SPTLC3	3.79e-13	-0.895968
MFSD6	4.29e-13	-0.610252
MANBA	7.58e-13	-0.652011
PKIB	1.39e-12	-1.4766
LINC00936	1.69e-12	-0.734514
OPRK1	3.15e-12	-1.11238
FAM198B	7.08e-12	-0.853977
CBLN2	7.24e-12	-1.15177
EXPH5	7.42e-12	-0.810252
ZDHHC13	1.08e-11	-0.634491
CCNE2	1.68e-11	-0.62149
PRC1	2.29e-11	-0.715832
NUCB2	4.23e-11	-0.715055
SSBP2	9.04e-11	-0.971854
MANEA	1.05e-10	-0.821998
MYRIP	1.45e-10	-0.758333
GINS1	2.09e-10	-0.644786
TMEM144	2.32e-10	-0.722351
SI	3.06e-10	-1.57233
ATP1B1	3.57e-10	-0.639121
NDC80	4.28e-10	-0.77591
LINC01133	6.44e-10	-1.52821
ZWINT	7.55e-10	-0.585547
PBK	2.41e-09	-1.08143
CDK8	3.47e-09	-0.692207
PSAT1	3.5e-09	-0.59508
TOX3	4.89e-09	-0.680882
OSR2	5.78e-09	-0.947637
SELENBP1	1e-08	-0.597111
TMEM38B	1.54e-08	-0.849455
DIO1	1.96e-08	-1.4718
DLGAP5	1.59e-07	-0.829509
ANP32E	1.95e-07	-0.861744
MT1X	2.57e-07	-1.03337
PTPRR	3.23e-07	-0.96555
DENND1B	3.35e-07	-0.826001
CTH	4.77e-07	-0.587598
SLC44A1	1.87e-06	-1.0997
AGO4	2.22e-06	-0.581526
MAN1A1	3.03e-06	-1.15539
SLC7A11	5.02e-06	-0.64224
TULP4	8.34e-06	-0.641904
NUSAP1	1.09e-05	-0.986411
HSPA4L	1.37e-05	-0.713893
DGKH	1.69e-05	-0.953463
ABCG1	4.92e-05	-0.614622
COL16A1	6.35e-05	-0.591177
PIK3R3	0.000190936	-0.745254
KCNU1	0.000225346	-0.749771
KIAA0101	0.000288898	-0.698412
GGH	0.000294163	-0.651544
CCNB2	0.000327566	-0.674102
MID1	0.000508997	-0.627453
CDKN3	0.000511653	-0.912192
PITX1	0.000541194	-0.69833
SNRK	0.000612494	-0.661355
ANXA9	0.000756569	-0.586769
ZBTB43	0.000767625	-0.587555
SLC12A2	0.00134825	-0.72798
GPR63	0.00152858	-0.818058
D1JB4	0.00202016	-0.587185
FGF13	0.00203159	-0.781785
BCHE	0.00308119	-0.589704
TMEM158	0.0032572	-0.615251
AMIGO2	0.00375694	-1.31915
LRIG3	0.00395194	-0.713674
1NOS1	0.00398968	-0.589404

## Sheet: Table S4
CCX771-altered genes							AMD1300-altered genes
gene	logFC	logCPM	PValue	FDR			gene	logFC	logCPM	PValue	FDR
CYP1A2	-4.02932	5.09269	1.99e-104	5.44e-100			PLEC	-4.60594	5.99615	1.89e-62	5.15e-58
FASN	-3.74183	9.06847	1.5e-84	2.05e-80			PRRC2A	-2.74158	7.13032	5.63e-52	7.69e-48
PLEC	-4.42639	5.99615	1.78e-58	1.62e-54			LAMA5	-2.90617	5.71114	9e-47	8.19e-43
FAM129A	-3.20167	3.42997	2.87e-55	1.96e-51			FASN	-2.58256	9.06847	2.93e-45	1.33e-41
PRRC2A	-2.65203	7.13032	4.9e-49	2.67e-45			MYH14	-2.82316	5.50607	3.62e-44	1.41e-40
LDLR	-2.07983	6.15996	1.63e-46	7.39e-43			TLN1	-2.84668	5.90523	3.47e-43	1.18e-39
MYH14	-2.89426	5.50607	4.62e-46	1.58e-42			SOGA1	-3.60425	4.67171	4.83e-42	1.47e-38
KIF1A	-2.6319	5.51423	1.84e-44	5.57e-41			HCFC1	-2.79509	5.35071	8.85e-42	2.41e-38
LAMA5	-2.8032	5.71114	7.72e-44	2.11e-40			PRR12	-3.12657	3.52552	9.71e-42	2.41e-38
BCL9L	-2.86851	4.89474	9.56e-44	2.37e-40			MYH9	-3.09566	7.81631	1.38e-41	3.03e-38
ADM2	-2.26186	5.38807	1.8e-43	4.09e-40			PRRC2B	-2.41506	7.13536	1.44e-41	3.03e-38
TLN1	-2.82191	5.90523	1.78e-42	3.75e-39			NFIX	-2.11381	7.58376	1.67e-41	3.26e-38
PRRC2B	-2.3901	7.13536	8.44e-41	1.65e-37			BCL9L	-2.75608	4.89474	7.7e-41	1.4e-37
HCFC1	-2.71042	5.35071	1.81e-39	3.29e-36			HSPG2	-5.19556	1.90728	1.12e-40	1.9e-37
CYP1A1	-2.2225	4.35521	2.85e-39	4.87e-36			TNRC18	-3.19108	4.6596	1.5e-40	2.41e-37
SCD	-1.76922	9.86225	3.22e-39	5.17e-36			NFIC	-2.72102	5.03832	2.12e-39	3.21e-36
NOTCH1	-2.94794	4.14967	5.15e-39	7.81e-36			CEP170B	-2.42888	5.28113	2.38e-39	3.42e-36
INSIG1	-1.75582	9.44506	7.51e-39	1.08e-35			POLR2A	-2.76448	5.04105	7.54e-39	1.03e-35
CEP170B	-2.41511	5.28113	7.98e-39	1.09e-35			AHDC1	-2.81119	3.32257	3.96e-38	5.15e-35
RRM2	1.90709	6.3637	1.02e-38	1.28e-35			LRP1	-3.32931	3.72228	5.62e-38	6.97e-35
KDM6B	-2.87552	4.18719	1.11e-38	1.32e-35			SRRM2	-3.27127	5.71846	6.65e-37	7.89e-34
SOGA1	-3.43235	4.67171	1.19e-38	1.36e-35			ARID1A	-2.68375	4.62588	8.74e-37	9.94e-34
ABCA2	-2.25177	6.0372	2e-38	2.19e-35			KIF1A	-2.335	5.51423	5.77e-36	5.94e-33
MYH9	-2.9111	7.81631	1.67e-37	1.75e-34			NOTCH1	-2.8109	4.14967	5.87e-36	5.94e-33
POLR2A	-2.70003	5.04105	3.32e-37	3.36e-34			ABCA2	-2.16469	6.0372	8.22e-36	8.01e-33
PRR12	-2.94375	3.52552	3.52e-37	3.43e-34			SPTBN2	-3.50602	4.83319	1.51e-35	1.42e-32
LRP1	-3.25011	3.72228	2.86e-36	2.69e-33			INTS1	-2.44167	6.3266	2.93e-35	2.67e-32
TNRC18	-2.95297	4.6596	2.33e-35	2.12e-32			KMT2D	-3.08879	4.1878	3.65e-34	3.11e-31
HSPG2	-4.93129	1.90728	2.62e-35	2.31e-32			ATN1	-2.28991	5.46199	4.18e-34	3.46e-31
NFIC	-2.52706	5.03832	2e-34	1.71e-31			NUMA1	-2.86399	6.48752	4.57e-34	3.67e-31
MYO18A	-2.95873	4.19287	7.57e-34	6.26e-31			ZMIZ1	-2.31178	5.01852	4.87e-34	3.8e-31
HMGCS1	-1.75147	7.83137	8.77e-34	7.04e-31			KDM6B	-2.66898	4.18719	7.64e-34	5.79e-31
SEC16A	-2.02905	5.78875	1.31e-33	1.02e-30			EP300	-2.70243	4.71101	1.4e-33	1.03e-30
ATN1	-2.26037	5.46199	2.77e-33	2.1e-30			AGRN	-1.99125	6.65022	1.83e-33	1.31e-30
KMT2D	-3.02417	4.1878	8.06e-33	5.79e-30			SEC16A	-2.01259	5.78875	3.77e-33	2.64e-30
PTPRF	-1.83172	7.85861	1.43e-32	1e-29			NCOR2	-2.76272	3.9603	3.16e-32	2.16e-29
INTS1	-2.33256	6.3266	1.63e-32	1.11e-29			PTPRF	-1.81384	7.85861	5.18e-32	3.45e-29
PIEZO1	-2.04716	6.40952	4.12e-32	2.68e-29			MYO9B	-2.9525	3.73256	5.91e-32	3.84e-29
C9orf172	-3.02405	2.87335	1.01e-31	6.4e-29			MYO18A	-2.85815	4.19287	6.19e-32	3.93e-29
AHDC1	-2.56096	3.32257	1.24e-31	7.7e-29			PIEZO1	-2.03702	6.40952	7.56e-32	4.69e-29
GDF15	-1.81735	6.08083	1.41e-31	8.57e-29			ITPR3	-2.56795	4.60909	1.73e-31	1.05e-28
EP300	-2.60914	4.71101	1.85e-31	1.1e-28			CREBBP	-2.77449	4.00983	2.84e-31	1.69e-28
RREB1	-2.50379	4.00111	3.1e-31	1.8e-28			HUWE1	-2.17575	7.01357	3.64e-30	2.11e-27
SLC6A9	-2.13439	4.29112	4.72e-31	2.68e-28			SSPO	-3.06535	2.72525	4.39e-30	2.5e-27
SRRM2	-2.94325	5.71846	7.24e-31	4.03e-28			SCAF1	-2.1138	5.35122	5.58e-30	3.11e-27
PKD1	-2.61329	4.13765	2.02e-30	1.1e-27			WNK2	-2.78952	3.88767	6.32e-30	3.45e-27
NFIX	-1.77578	7.58376	2.51e-30	1.34e-27			NOTCH3	-1.77271	6.23622	7.82e-30	4.18e-27
SPTBN2	-3.18726	4.83319	3.42e-30	1.79e-27			DLG5	-1.93205	5.83763	8.83e-30	4.63e-27
OBSCN	-3.14149	3.85224	3.67e-30	1.89e-27			FLNB	-2.02069	8.15609	1.35e-29	6.98e-27
ARID1A	-2.39202	4.62588	7.52e-30	3.8e-27			PLXNB2	-2.12983	6.23398	1.54e-29	7.76e-27
SSPO	-3.06667	2.72525	9.32e-30	4.63e-27			ADGRL1	-2.17417	4.96293	1.88e-29	9.17e-27
NCOR2	-2.62725	3.9603	2.69e-29	1.31e-26			PTPRS	-1.9137	6.04214	1.88e-29	9.17e-27
CREBBP	-2.65429	4.00983	9.73e-29	4.66e-26			RREB1	-2.41318	4.00111	2.92e-29	1.4e-26
NUMA1	-2.58604	6.48752	1.32e-28	6.23e-26			CHD3	-2.37399	6.72567	6.12e-29	2.88e-26
AGRN	-1.8092	6.65022	3.92e-28	1.81e-25			OBSCN	-3.04877	3.85224	1.03e-28	4.76e-26
LPIN1	-1.82256	6.27203	1.01e-27	4.61e-25			CELSR1	-1.90569	5.18825	1.16e-28	5.29e-26
CDK1	1.47346	7.24236	1.62e-27	7.26e-25			PKD1	-2.5218	4.13765	1.27e-28	5.69e-26
LSS	-1.56469	7.60256	2.29e-27	1.01e-24			RAI1	-2.18564	4.92028	4.2e-28	1.85e-25
SCAF1	-2.02664	5.35122	2.35e-27	1.02e-24			FOXRED2	-2.0337	6.2642	6.91e-28	2.99e-25
DLG5	-1.8351	5.83763	4.29e-27	1.83e-24			HELZ2	-2.45431	4.58245	8.08e-28	3.44e-25
HELZ2	-2.41931	4.58245	4.89e-27	2.06e-24			PPL	-2.94819	3.42861	1.14e-27	4.78e-25
WNK2	-2.64114	3.88767	5.05e-27	2.09e-24			CELSR2	-2.41073	4.15788	1.29e-27	5.33e-25
CHAC1	-1.89526	4.21077	5.93e-27	2.41e-24			TRRAP	-2.05824	5.48116	5.31e-27	2.16e-24
DDIT4	-1.51884	7.24079	6.72e-27	2.7e-24			FOXP4	-2.36913	3.92398	1.16e-26	4.67e-24
CELSR1	-1.85411	5.18825	8.26e-27	3.23e-24			TAOK2	-1.84778	5.17988	2.33e-26	9.23e-24
SLC7A11	-1.83659	6.69991	8.29e-27	3.23e-24			BCOR	-2.07536	4.86219	2.68e-26	1.05e-23
FLNB	-1.90652	8.15609	1.07e-26	4.1e-24			PHRF1	-1.99452	4.71905	2.86e-26	1.1e-23
MYO9B	-2.66127	3.73256	1.89e-26	7.18e-24			SIPA1L3	-2.60484	3.52852	3.09e-26	1.17e-23
ACSL1	-1.44042	9.80046	3.13e-26	1.17e-23			TCOF1	-3.06511	2.83474	3.18e-26	1.19e-23
HUWE1	-2.00359	7.01357	4.48e-26	1.65e-23			PLXNB3	-2.21994	3.96152	3.86e-26	1.42e-23
ITPR3	-2.30678	4.60909	6.07e-26	2.21e-23			GSE1	-1.78563	5.96961	5.81e-26	2.11e-23
NOTCH3	-1.64214	6.23622	6.32e-26	2.27e-23			EP400	-2.9605	3.19824	1.28e-25	4.61e-23
SBF1	-1.76633	6.10114	9.99e-26	3.54e-23			UBR4	-2.19923	5.03239	2.15e-25	7.6e-23
ADGRL1	-2.01719	4.96293	1.11e-25	3.89e-23			FBRSL1	-1.85416	4.34476	2.66e-25	9.3e-23
GSE1	-1.77366	5.96961	1.28e-25	4.42e-23			MAP7D1	-1.94562	4.9295	3.02e-25	1.04e-22
PLIN4	-4.0431	0.647386	1.42e-25	4.86e-23			HIPK2	-1.82394	5.63727	5.06e-25	1.73e-22
ZMIZ1	-1.97509	5.01852	1.48e-25	4.98e-23			SMARCA4	-2.42045	5.60757	8.79e-25	2.96e-22
TACC2	-2.20884	4.33751	1.65e-25	5.48e-23			RNF213	-2.21666	5.71725	9.55e-25	3.18e-22
MLXIP	-1.91163	4.9236	2.72e-25	8.94e-23			SBF1	-1.72612	6.10114	1.05e-24	3.45e-22
GPNMB	-1.5656	6.44069	2.97e-25	9.65e-23			DYNC1H1	-2.13722	7.55264	1.85e-24	6.02e-22
EXO1	1.97475	3.85652	3.3e-25	1.06e-22			PIP5K1C	-1.90535	4.31405	2.08e-24	6.67e-22
TRRAP	-1.97703	5.48116	4.33e-25	1.37e-22			MYBBP1A	-1.70155	5.06952	2.66e-24	8.44e-22
CELSR2	-2.29191	4.15788	4.35e-25	1.37e-22			LIMD1	-3.71862	3.03205	4.41e-24	1.39e-21
PLXNB2	-1.93794	6.23398	5.95e-25	1.85e-22			COL5A1	-2.31207	2.79859	6.53e-24	2.03e-21
CHD3	-2.17473	6.72567	7.79e-25	2.39e-22			C9orf172	-2.5888	2.87335	7.71e-24	2.37e-21
RNF213	-2.22139	5.71725	7.98e-25	2.39e-22			WIZ	-1.82943	5.15184	1.33e-23	4.05e-21
CDC6	1.58291	5.91767	1.17e-24	3.46e-22			EVPL	-2.93715	4.21149	1.62e-23	4.86e-21
ATXN2L	-1.85588	3.99532	1.34e-24	3.93e-22			TBC1D10C	-6.47796	0.320689	2.14e-23	6.34e-21
PIP5K1C	-1.91187	4.31405	1.9e-24	5.52e-22			ZNF646	-2.18298	3.99649	2.35e-23	6.9e-21
FOXRED2	-1.88377	6.2642	2.6e-24	7.48e-22			ZFHX3	-2.44475	4.19592	4.15e-23	1.21e-20
SLC7A5	-1.66495	6.36817	3.18e-24	9.05e-22			CASZ1	-1.90272	4.49083	5.56e-23	1.6e-20
SIPA1L3	-2.50098	3.52852	3.49e-24	9.83e-22			GTF3C1	-1.56875	6.20721	9.47e-23	2.69e-20
RAI1	-2.00818	4.92028	4.63e-24	1.29e-21			MEGF8	-1.98007	4.71121	1.13e-22	3.19e-20
TBC1D10C	-6.50436	0.320689	4.78e-24	1.32e-21			CABIN1	-1.83958	4.90792	1.86e-22	5.15e-20
CIC	-2.90089	3.61602	5.56e-24	1.52e-21			CIC	-2.79026	3.61602	1.87e-22	5.15e-20
CDC45	1.77085	5.17729	8.23e-24	2.22e-21			ZNF142	-2.42922	2.76395	2.19e-22	5.99e-20
PTPN23	-2.03475	3.69993	9.74e-24	2.61e-21			SHROOM2	-1.8217	4.03629	2.89e-22	7.81e-20
FAM83H	-1.78881	6.84267	1.01e-23	2.67e-21			ZNF609	-1.94778	4.96443	2.93e-22	7.85e-20
STC2	-1.46877	5.71426	1.66e-23	4.37e-21			PSD4	-1.58422	5.2316	3.17e-22	8.39e-20
MEGF8	-2.01651	4.71121	2.12e-23	5.52e-21			MINK1	-1.60311	5.53803	3.5e-22	9.18e-20
FOXP4	-2.19887	3.92398	3.22e-23	8.29e-21			RRBP1	-3.33826	4.24942	8.17e-22	2.13e-19
ZNF646	-2.18122	3.99649	3.27e-23	8.33e-21			NBEAL2	-1.90318	3.35411	9.08e-22	2.34e-19
PTPRS	-1.67654	6.04214	3.66e-23	9.24e-21			TNKS1BP1	-1.55115	6.98827	9.39e-22	2.4e-19
WIZ	-1.82429	5.15184	3.94e-23	9.88e-21			PTPN23	-1.92389	3.69993	1.7e-21	4.3e-19
DYNC1H1	-2.06943	7.55264	4.01e-23	9.96e-21			AP3D1	-1.48957	6.52832	6.7e-21	1.66e-18
AP3D1	-1.57261	6.52832	5.05e-23	1.24e-20			ATXN2L	-1.69569	3.99532	6.94e-21	1.71e-18
TPPP	-2.02273	2.97772	6.09e-23	1.49e-20			GIGYF1	-1.77943	4.19085	8.01e-21	1.95e-18
MSMO1	-1.32246	7.15211	8.87e-23	2.14e-20			SZT2	-2.07846	3.34183	8.29e-21	2e-18
COL5A1	-2.2604	2.79859	9.34e-23	2.24e-20			DOT1L	-2.01758	3.7859	8.99e-21	2.15e-18
PPL	-2.6412	3.42861	1.11e-22	2.65e-20			YLPM1	-1.98918	4.70092	1.12e-20	2.66e-18
TAOK2	-1.7022	5.17988	1.22e-22	2.86e-20			NUP210	-1.36089	5.66626	1.2e-20	2.81e-18
MNT	-2.26125	2.77649	1.24e-22	2.89e-20			MDC1	-2.46507	2.83225	1.2e-20	2.81e-18
MYBBP1A	-1.64938	5.06952	1.33e-22	3.06e-20			MTSS1L	-1.90267	3.57102	1.57e-20	3.64e-18
HIPK2	-1.7252	5.63727	1.33e-22	3.06e-20			TRIM56	-2.6306	3.27285	1.78e-20	4.09e-18
FBRSL1	-1.74701	4.34476	1.38e-22	3.13e-20			TACC2	-1.94822	4.33751	1.99e-20	4.54e-18
DTL	1.64752	4.41176	1.45e-22	3.27e-20			SKI	-1.59182	5.41518	2.19e-20	4.94e-18
CLIP2	-2.1348	2.39309	1.98e-22	4.41e-20			ZNF512B	-1.84073	4.08265	2.5e-20	5.6e-18
CDCA5	1.49001	5.99079	1.99e-22	4.41e-20			CEP131	-1.87605	3.82308	3.26e-20	7.23e-18
CABIN1	-1.83975	4.90792	2.1e-22	4.63e-20			IQSEC1	-1.73898	3.8446	3.35e-20	7.37e-18
MTSS1L	-1.99968	3.57102	2.66e-22	5.82e-20			KIAA1522	-1.42002	7.01903	3.61e-20	7.88e-18
BHLHE40	-1.60427	4.34993	2.98e-22	6.46e-20			LRP5	-1.50372	5.56992	3.72e-20	8.06e-18
BEST1	-2.09626	2.34295	3.31e-22	7.11e-20			ATG2A	-1.75769	4.6972	4.54e-20	9.68e-18
KRT75	-2.8876	0.969062	3.78e-22	8.05e-20			ZC3H18	-1.77191	4.03033	5.47e-20	1.16e-17
MAP4	-1.97979	5.88053	3.81e-22	8.05e-20			FAM193A	-2.15388	2.63309	5.97e-20	1.24e-17
LARP1	-1.43259	7.4044	3.86e-22	8.1e-20			FAM83H	-1.61843	6.84267	7.17e-20	1.48e-17
CASZ1	-1.84902	4.49083	9.54e-22	1.99e-19			NCOA6	-2.06159	3.89072	7.43e-20	1.52e-17
SLC12A7	-1.43839	5.6564	1.41e-21	2.92e-19			EIF4G1	-1.40118	8.51565	8.31e-20	1.69e-17
SQLE	-1.29883	6.70882	1.59e-21	3.27e-19			CDC42BPG	-1.7576	4.59753	9.32e-20	1.88e-17
LIMD1	-3.48015	3.03205	1.64e-21	3.35e-19			ZNF316	-1.69841	4.22677	9.35e-20	1.88e-17
MAP7D1	-1.77636	4.9295	2.16e-21	4.37e-19			RAPGEF1	-1.51311	4.65925	1.09e-19	2.16e-17
SZT2	-2.11352	3.34183	2.57e-21	5.09e-19			KANK2	-1.45354	5.51483	1.24e-19	2.44e-17
PHRF1	-1.77781	4.71905	2.99e-21	5.87e-19			EVC	-2.48734	2.99696	1.34e-19	2.62e-17
PLXNB3	-1.98444	3.96152	3.15e-21	6.15e-19			KDM4B	-1.41825	5.25574	1.76e-19	3.41e-17
WDR81	-1.81109	4.86565	3.47e-21	6.72e-19			POLR1A	-1.87264	4.38876	1.97e-19	3.79e-17
EVPL	-2.76934	4.21149	3.54e-21	6.81e-19			CHERP	-1.79103	4.24775	2.13e-19	4.06e-17
TNKS1BP1	-1.52639	6.98827	4.02e-21	7.67e-19			MAP4	-1.83445	5.88053	2.25e-19	4.27e-17
TRIB3	-1.41345	6.31771	4.21e-21	7.97e-19			SHANK2	-2.04033	3.93523	2.44e-19	4.59e-17
UBR4	-1.98088	5.03239	4.68e-21	8.81e-19			COL6A1	-1.32421	5.97401	2.78e-19	5.2e-17
MINK1	-1.55525	5.53803	5.85e-21	1.09e-18			PLEKHA6	-1.94998	3.10835	2.82e-19	5.24e-17
BCOR	-1.82841	4.86219	7.04e-21	1.31e-18			SCRIB	-1.59102	5.07216	3.16e-19	5.83e-17
ASF1B	1.66398	5.44652	8.59e-21	1.58e-18			SRCAP	-1.78761	5.11109	3.42e-19	6.26e-17
LAMB2	-1.48701	5.11091	8.63e-21	1.58e-18			KIAA1211	-2.39349	2.7087	3.74e-19	6.8e-17
MAP1B	-2.71709	4.73916	9.04e-21	1.65e-18			SHROOM3	-1.6412	5.10375	4.91e-19	8.83e-17
SREBF2	-1.2979	7.47047	1.05e-20	1.89e-18			GCN1L1	-1.29814	6.64702	4.92e-19	8.83e-17
MLLT1	-1.44818	5.90895	1.12e-20	2e-18			CMIP	-1.88832	3.70726	5.02e-19	8.96e-17
SMARCA4	-2.18071	5.60757	1.78e-20	3.17e-18			KIAA0556	-1.96674	3.40494	8.12e-19	1.42e-16
MBD6	-2.04074	2.89608	1.94e-20	3.45e-18			KIAA1549	-1.78974	3.59966	8.13e-19	1.42e-16
ZNF367	1.75224	4.21057	1.98e-20	3.48e-18			SPTAN1	-1.88337	5.26165	1.06e-18	1.84e-16
ATG2A	-1.77672	4.6972	2.12e-20	3.72e-18			CD37	-3.27137	0.473424	1.27e-18	2.19e-16
RAPGEF1	-1.53589	4.65925	3.62e-20	6.29e-18			SETD1B	-1.8589	3.20729	1.33e-18	2.29e-16
EP400	-2.59403	3.19824	4.42e-20	7.64e-18			MAST3	-1.82429	3.04912	1.42e-18	2.42e-16
ESCO2	1.95129	3.67695	5.3e-20	9.09e-18			CASKIN2	-1.66765	3.37177	1.46e-18	2.48e-16
ZNF142	-2.29864	2.76395	5.41e-20	9.22e-18			MPRIP	-1.45662	6.26589	1.71e-18	2.88e-16
HMOX1	-1.43874	6.62234	8.66e-20	1.47e-17			HECTD4	-2.0431	3.75302	1.78e-18	2.98e-16
SLC7A1	-1.21733	7.46706	8.76e-20	1.48e-17			TET3	-1.67927	4.21552	2.01e-18	3.34e-16
CASKIN2	-1.72654	3.37177	9.35e-20	1.57e-17			SAMD4B	-1.53934	4.75773	2.24e-18	3.7e-16
BRD4	-1.7102	4.29346	1.11e-19	1.85e-17			MNT	-2.0172	2.77649	2.42e-18	3.97e-16
SKI	-1.56044	5.41518	1.24e-19	2.05e-17			CDC42BPB	-1.49999	5.79758	2.94e-18	4.81e-16
TRIM56	-2.57465	3.27285	1.29e-19	2.11e-17			FN1	-1.681	6.5293	3.35e-18	5.44e-16
NUP210	-1.32399	5.66626	1.35e-19	2.19e-17			MICAL3	-1.72867	4.04848	3.47e-18	5.6e-16
ZNF609	-1.8125	4.96443	1.5e-19	2.43e-17			CLUH	-1.5486	6.38838	3.93e-18	6.32e-16
LTBP2	-2.02542	2.56608	1.71e-19	2.74e-17			LARP1	-1.27515	7.4044	5.55e-18	8.86e-16
EVC	-2.48618	2.99696	1.86e-19	2.97e-17			WNK1	-1.6551	5.78434	6.74e-18	1.07e-15
COL6A1	-1.33094	5.97401	1.99e-19	3.16e-17			CLIP2	-1.88011	2.39309	8.84e-18	1.39e-15
NCR3LG1	-2.45579	3.26389	2.02e-19	3.19e-17			REXO1	-1.97083	2.50125	9.52e-18	1.49e-15
ACTN4	-1.42078	7.1891	2.41e-19	3.78e-17			ARHGEF11	-1.66693	4.58125	1.01e-17	1.57e-15
CLUH	-1.60381	6.38838	2.81e-19	4.38e-17			LAMB2	-1.36051	5.11091	1.01e-17	1.57e-15
KIAA1522	-1.38464	7.01903	2.9e-19	4.5e-17			ABCA7	-1.52516	4.12564	1.08e-17	1.66e-15
LRP5	-1.46544	5.56992	3.34e-19	5.15e-17			ACTN4	-1.34693	7.1891	1.33e-17	2.04e-15
PLEKHA6	-1.95145	3.10835	3.98e-19	6.1e-17			FYCO1	-1.9153	4.55684	1.41e-17	2.15e-15
PCSK9	-3.49175	-0.111542	4.41e-19	6.73e-17			MBD6	-1.8747	2.89608	1.55e-17	2.35e-15
LYNX1	-1.59232	5.18764	4.76e-19	7.22e-17			MLXIP	-1.55533	4.9236	1.73e-17	2.59e-15
MTHFR	-1.39175	5.35021	5.84e-19	8.81e-17			ARHGAP33	-2.35255	1.69804	1.78e-17	2.65e-15
ABTB2	-1.47723	4.74957	9.18e-19	1.38e-16			ULK1	-1.48745	4.63004	2.14e-17	3.17e-15
HSPA6	-4.35018	-0.100866	9.37e-19	1.4e-16			ZC3H7B	-1.27464	5.8682	2.2e-17	3.24e-15
TBC1D16	-1.25214	6.79309	9.57e-19	1.42e-16			BCORL1	-2.44959	2.21797	2.63e-17	3.87e-15
SAMD4B	-1.55283	4.75773	1.3e-18	1.92e-16			GBF1	-1.26947	6.23441	2.77e-17	4.04e-15
CDC42BPG	-1.70067	4.59753	1.34e-18	1.97e-16			TPPP	-1.73644	2.97772	2.82e-17	4.1e-15
PI4KA	-1.23662	6.27978	1.53e-18	2.23e-16			FBRS	-1.50411	4.87018	3.75e-17	5.42e-15
ABR	-1.51488	5.29386	1.72e-18	2.5e-16			PACS1	-1.64773	3.84544	3.99e-17	5.74e-15
ZNF512B	-1.74661	4.08265	1.98e-18	2.87e-16			MAPK8IP3	-1.96379	3.26932	4.58e-17	6.55e-15
IRS1	-1.57825	4.42155	2.14e-18	3.07e-16			SBK1	-2.0437	3.15806	6.06e-17	8.6e-15
FEN1	1.27496	6.42034	2.56e-18	3.65e-16			TRIO	-1.7857	4.01462	6.08e-17	8.6e-15
ZNF316	-1.63103	4.22677	2.66e-18	3.78e-16			PLXND1	-1.90107	2.39713	6.96e-17	9.79e-15
KIAA1211	-2.33822	2.7087	2.73e-18	3.86e-16			FGFRL1	-1.33442	6.04421	7.17e-17	1e-14
KDM4B	-1.37123	5.25574	2.82e-18	3.96e-16			ELMSAN1	-1.49185	4.16898	8.53e-17	1.19e-14
ARHGAP33	-2.40544	1.69804	2.99e-18	4.18e-16			IQCE	-1.34114	4.9801	8.79e-17	1.22e-14
CIZ1	-1.54806	4.9997	3.1e-18	4.31e-16			FOXK1	-1.80394	3.8287	9.16e-17	1.26e-14
MPRIP	-1.44101	6.26589	4.01e-18	5.53e-16			BCR	-1.40625	5.53815	9.48e-17	1.29e-14
EIF4G1	-1.33004	8.51565	4.73e-18	6.49e-16			MAP1B	-2.37946	4.73916	1.24e-16	1.69e-14
LIPG	-1.87433	1.77758	5.14e-18	7.02e-16			BRD4	-1.55457	4.29346	1.26e-16	1.7e-14
NCOA6	-1.95262	3.89072	5.73e-18	7.75e-16			PLIN4	-3.38729	0.647386	1.27e-16	1.7e-14
POLR1A	-1.79042	4.38876	6.68e-18	8.89e-16			ANKRD52	-1.38365	4.98041	1.39e-16	1.85e-14
SRCAP	-1.73027	5.11109	6.76e-18	8.95e-16			CC2D1A	-1.42483	4.76329	1.64e-16	2.18e-14
IRS2	-2.65658	1.28333	6.86e-18	9.02e-16			IGF2R	-1.32181	7.758	1.65e-16	2.19e-14
CDC42BPB	-1.48405	5.79758	6.87e-18	9.02e-16			ITGB4	-2.07892	3.0871	2.25e-16	2.96e-14
BCAT1	-1.7146	3.37971	7.01e-18	9.13e-16			CIZ1	-1.45564	4.9997	2.33e-16	3.06e-14
RRBP1	-2.96378	4.24942	7.02e-18	9.13e-16			KDM5C	-1.2074	6.10254	3.02e-16	3.95e-14
PSD4	-1.4067	5.2316	7.35e-18	9.51e-16			DAGLA	-1.68999	3.09717	3.24e-16	4.22e-14
SHANK2	-1.9482	3.93523	9.93e-18	1.28e-15			PTPN14	-1.97191	2.6493	3.34e-16	4.32e-14
CMIP	-1.81846	3.70726	1.18e-17	1.51e-15			UBE2O	-1.56677	4.70162	3.37e-16	4.34e-14
IQSEC1	-1.61979	3.8446	1.19e-17	1.52e-15			MED12	-1.52384	4.3197	3.64e-16	4.66e-14
ORC6	1.48013	4.00803	1.37e-17	1.74e-15			ABL1	-1.3261	5.23463	3.98e-16	5.08e-14
SCRIB	-1.51447	5.07216	1.5e-17	1.89e-15			LOC284600	-1.94154	1.96368	5.07e-16	6.44e-14
CENPU	1.55143	4.97029	1.54e-17	1.94e-15			BRPF3	-1.26533	5.28379	6.51e-16	8.23e-14
GIGYF1	-1.62049	4.19085	1.67e-17	2.09e-15			LTBP2	-1.81353	2.56608	6.57e-16	8.26e-14
HECTD4	-1.98598	3.75302	1.67e-17	2.09e-15			TBC1D16	-1.14163	6.79309	6.6e-16	8.26e-14
PACS1	-1.66845	3.84544	1.82e-17	2.26e-15			PRPF8	-1.12663	7.51916	6.66e-16	8.3e-14
MAPK8IP3	-1.9911	3.26932	1.85e-17	2.29e-15			AUTS2	-1.70649	2.79416	8.49e-16	1.05e-13
CHERP	-1.6935	4.24775	1.88e-17	2.31e-15			TNK2	-1.5666	4.38147	8.64e-16	1.07e-13
RAD51	1.5795	3.78657	2.25e-17	2.76e-15			TONSL	-1.59375	3.65605	8.91e-16	1.1e-13
TP53INP2	-1.46182	4.67809	2.35e-17	2.86e-15			MLLT1	-1.23663	5.90895	1.35e-15	1.65e-13
SPTAN1	-1.80593	5.26165	2.38e-17	2.89e-15			SPTBN5	-2.06596	2.87306	1.39e-15	1.69e-13
TET3	-1.6255	4.21552	2.76e-17	3.33e-15			MTCL1	-2.48215	1.71334	1.43e-15	1.74e-13
YLPM1	-1.79788	4.70092	2.81e-17	3.39e-15			GOLGA3	-1.89549	4.50033	1.99e-15	2.4e-13
ASNS	-1.09745	7.79015	3.09e-17	3.69e-15			HTT	-1.22626	5.51661	2.31e-15	2.77e-13
FAM193A	-2.00024	2.63309	3.34e-17	3.98e-15			DIDO1	-1.38633	5.56114	2.38e-15	2.85e-13
GBF1	-1.26677	6.23441	3.4e-17	4.03e-15			NES	-2.09321	2.78158	2.63e-15	3.14e-13
GTF3C1	-1.34232	6.20721	3.58e-17	4.23e-15			DOCK6	-1.51598	3.89059	2.69e-15	3.2e-13
MVD	-1.47131	6.36564	3.81e-17	4.48e-15			ABCC1	-1.51013	4.35286	3.01e-15	3.56e-13
LINGO4	-2.65843	0.706612	3.99e-17	4.68e-15			WASH5P	-1.594	4.72522	3.07e-15	3.61e-13
PLXND1	-1.92712	2.39713	4.08e-17	4.76e-15			PLEKHH1	-1.64468	4.39622	3.14e-15	3.68e-13
CASKIN1	-2.74013	1.27656	4.16e-17	4.82e-15			SYNGAP1	-1.74265	2.55184	3.33e-15	3.88e-13
MED18	-3.30558	1.84255	4.45e-17	5.13e-15			PI4KA	-1.10412	6.27978	3.73e-15	4.33e-13
CC2D1A	-1.45294	4.76329	4.96e-17	5.69e-15			NLGN2	-1.70791	3.10574	3.81e-15	4.41e-13
BCORL1	-2.44065	2.21797	5.29e-17	6.05e-15			NCKAP5L	-1.87716	2.59942	4.24e-15	4.88e-13
ZC3H7B	-1.26002	5.8682	5.37e-17	6.11e-15			SH3PXD2A	-1.5562	4.11902	4.44e-15	5.09e-13
KIAA0556	-1.86017	3.40494	5.89e-17	6.67e-15			LAMC3	-1.49798	3.53968	4.64e-15	5.28e-13
HMGB2	1.17599	6.89793	6.29e-17	7.09e-15			RPTOR	-1.31356	4.3959	4.8e-15	5.44e-13
FYCO1	-1.87021	4.55684	7.87e-17	8.84e-15			ZNF618	-1.49811	3.77017	5.04e-15	5.68e-13
SETD1B	-1.76413	3.20729	8.04e-17	9e-15			SPEN	-2.91891	2.46676	5.35e-15	6.01e-13
NOS3	-1.85021	1.86109	1.05e-16	1.17e-14			MACF1	-2.57126	4.84491	5.88e-15	6.58e-13
KLK3	1.13501	8.86754	1.07e-16	1.19e-14			HERC2	-1.40225	5.23696	7.39e-15	8.23e-13
MAST3	-1.73328	3.04912	1.07e-16	1.19e-14			BAZ2A	-1.36989	5.3836	8.03e-15	8.87e-13
ABCA7	-1.47721	4.12564	1.15e-16	1.27e-14			H6PD	-1.26722	5.54513	8.09e-15	8.91e-13
LMX1B	-1.83872	2.04573	1.29e-16	1.42e-14			FAM65A	-1.64812	3.5187	8.17e-15	8.96e-13
GINS2	1.46271	4.68735	1.37e-16	1.49e-14			ARFGEF3	-1.28974	6.5006	8.83e-15	9.65e-13
KLK2	1.24382	5.38776	1.42e-16	1.54e-14			NCR3LG1	-2.09026	3.26389	1.09e-14	1.18e-12
ABCC1	-1.58454	4.35286	1.48e-16	1.6e-14			ZNF629	-2.27293	2.55097	1.18e-14	1.28e-12
ARHGEF11	-1.6048	4.58125	1.63e-16	1.75e-14			COL6A2	-1.48734	4.92691	1.23e-14	1.32e-12
ARHGEF4	-2.00458	2.28475	1.96e-16	2.1e-14			ZNF517	-1.88445	2.09096	1.34e-14	1.44e-12
ULK1	-1.44166	4.63004	2.05e-16	2.19e-14			ZZEF1	-1.34809	5.09438	1.47e-14	1.57e-12
FDFT1	-1.11045	9.77713	2.43e-16	2.59e-14			CASKIN1	-2.51525	1.27656	1.6e-14	1.7e-12
SYNM	-1.65095	4.07541	2.75e-16	2.91e-14			DNMT1	-1.68805	5.27782	1.62e-14	1.72e-12
H6PD	-1.33578	5.54513	3.03e-16	3.19e-14			ZCCHC14	-1.54683	3.34412	1.62e-14	1.72e-12
BCR	-1.38165	5.53815	3.36e-16	3.52e-14			COL1A1	-1.56593	3.68582	1.72e-14	1.81e-12
DOT1L	-1.76127	3.7859	3.61e-16	3.77e-14			PCNXL3	-1.22375	5.71393	1.82e-14	1.91e-12
PCNXL3	-1.30401	5.71393	3.62e-16	3.77e-14			EEF2K	-1.45	3.34382	2e-14	2.09e-12
ZC3H18	-1.57776	4.03033	4.42e-16	4.59e-14			ABR	-1.31431	5.29386	2.27e-14	2.36e-12
LMTK3	-2.09159	1.74673	5.12e-16	5.29e-14			ZC3H4	-1.46926	4.13827	2.3e-14	2.38e-12
PPARGC1B	-1.61283	2.77999	5.39e-16	5.56e-14			CLSTN1	-1.07157	7.21361	2.36e-14	2.44e-12
VWA2	-2.34103	2.28269	5.45e-16	5.59e-14			MED18	-3.00604	1.84255	2.4e-14	2.47e-12
FBRS	-1.45504	4.87018	5.8e-16	5.93e-14			TNS2	-1.44418	3.9254	2.49e-14	2.56e-12
MED12	-1.50876	4.3197	7.78e-16	7.93e-14			EME2	-1.6092	2.60076	2.84e-14	2.91e-12
COL6A2	-1.56341	4.92691	8.28e-16	8.4e-14			CAPN15	-1.61708	3.66829	2.93e-14	2.99e-12
MYO10	-1.64202	4.90646	8.37e-16	8.46e-14			WDR81	-1.4472	4.86565	3.08e-14	3.12e-12
ZFHX3	-1.9717	4.19592	8.81e-16	8.87e-14			ECE1	-1.44235	3.45368	3.18e-14	3.22e-12
TRIO	-1.71861	4.01462	8.89e-16	8.92e-14			PVRL1	-1.31328	4.80222	4.35e-14	4.38e-12
EME2	-1.7041	2.60076	9.24e-16	9.24e-14			LENG8	-1.3491	3.95683	4.76e-14	4.77e-12
MELK	1.24833	5.0968	9.39e-16	9.36e-14			IRS2	-2.34306	1.28333	5.6e-14	5.6e-12
NCKAP5L	-1.9289	2.59942	9.79e-16	9.72e-14			POLE	-1.35586	4.15905	5.67e-14	5.65e-12
SHROOM2	-1.50432	4.03629	1.21e-15	1.2e-13			FHDC1	-2.98609	1.30725	5.78e-14	5.74e-12
UBE2O	-1.53756	4.70162	1.29e-15	1.27e-13			MYO15B	-1.9728	2.2358	6.45e-14	6.38e-12
SLC26A1	-1.70341	3.55797	1.32e-15	1.29e-13			CBFA2T2	-1.5591	4.29504	6.76e-14	6.66e-12
KDM5C	-1.18047	6.10254	1.4e-15	1.37e-13			HIP1	-1.49499	5.4783	6.81e-14	6.69e-12
BAZ2A	-1.40902	5.3836	1.48e-15	1.45e-13			PML	-1.58099	2.76831	7.28e-14	7.13e-12
GCN1L1	-1.15954	6.64702	1.54e-15	1.5e-13			MYO10	-1.51423	4.90646	9.37e-14	9.07e-12
GOLGA3	-1.90263	4.50033	1.71e-15	1.66e-13			MAGT1	-1.48947	5.86224	9.99e-14	9.64e-12
SHROOM3	-1.46206	5.10375	1.89e-15	1.82e-13			LMTK3	-1.91767	1.74673	1.11e-13	1.07e-11
IQCE	-1.27981	4.9801	2.23e-15	2.14e-13			SLC12A7	-1.11392	5.6564	1.21e-13	1.16e-11
PRDM16	-1.87111	1.3874	2.38e-15	2.28e-13			TRERF1	-1.66136	3.32411	1.22e-13	1.16e-11
KANK2	-1.26733	5.51483	2.61e-15	2.49e-13			SETD1A	-1.5231	3.15527	1.25e-13	1.19e-11
REXO1	-1.82719	2.50125	2.96e-15	2.81e-13			ZBTB7A	-1.29695	3.92133	1.33e-13	1.26e-11
FADS1	-1.09642	7.20875	3.37e-15	3.2e-13			CCDC154	-2.57382	0.729794	1.45e-13	1.37e-11
NEIL3	1.72456	2.32554	4.21e-15	3.97e-13			CRTC1	-1.46085	4.03801	1.52e-13	1.43e-11
BRPF3	-1.23064	5.28379	4.22e-15	3.97e-13			CCDC88C	-1.54152	4.07196	1.73e-13	1.62e-11
DHCR7	-1.11122	8.27435	4.37e-15	4.1e-13			RBSN	-1.72603	3.36729	1.87e-13	1.75e-11
FGFRL1	-1.2529	6.04421	4.64e-15	4.34e-13			COL4A5	-1.42896	5.33462	2.28e-13	2.12e-11
ALDH3B2	-1.17288	5.89176	5.54e-15	5.14e-13			MYLK	-1.39384	6.86792	2.61e-13	2.42e-11
ITGB4	-1.98827	3.0871	5.58e-15	5.17e-13			CUX1	-1.2	5.41331	3.07e-13	2.84e-11
TNK2	-1.52451	4.38147	5.86e-15	5.41e-13			ZBTB4	-1.27486	4.66843	3.38e-13	3.11e-11
MAD2L1	1.22123	5.61036	6e-15	5.52e-13			PCNT	-2.11816	3.622	3.42e-13	3.14e-11
CRTC1	-1.54614	4.03801	6.13e-15	5.62e-13			ZNF462	-1.68088	4.4374	3.85e-13	3.51e-11
CD37	-3.05077	0.473424	6.29e-15	5.75e-13			SMARCC2	-1.27368	5.12491	4.61e-13	4.18e-11
KIAA1217	-1.92157	3.5721	7.04e-15	6.37e-13			PPP1R13B	-1.26375	4.00349	4.76e-13	4.3e-11
MYO1C	-1.05627	7.90173	7.19e-15	6.47e-13			APC2	-1.58442	3.30404	5.39e-13	4.84e-11
TCF19	1.22551	5.75065	7.38e-15	6.62e-13			BPNT1	-1.47184	4.3088	5.73e-13	5.13e-11
ZZEF1	-1.36485	5.09438	7.46e-15	6.68e-13			PLXNB1	-1.24077	4.43994	5.79e-13	5.16e-11
DAGLA	-1.62186	3.09717	7.54e-15	6.72e-13			ARHGEF4	-1.75372	2.28475	5.96e-13	5.29e-11
MYCBP	1.24326	4.6751	7.93e-15	7.05e-13			TLE3	-1.02816	6.36273	5.97e-13	5.29e-11
VLDLR-AS1	-2.29085	0.388863	8.15e-15	7.23e-13			ZNF710	-1.37801	3.32089	7.04e-13	6.22e-11
C15orf52	-1.39724	4.49861	8.44e-15	7.46e-13			LPP	-1.58422	4.68673	7.1e-13	6.26e-11
NBEAL2	-1.55136	3.35411	8.87e-15	7.81e-13			PHF12	-1.14477	5.45009	7.76e-13	6.81e-11
ZBTB4	-1.36013	4.66843	9.77e-15	8.58e-13			EGFR	-1.39653	4.999	8.21e-13	7.19e-11
HERC2	-1.39602	5.23696	1.03e-14	8.97e-13			ZNF865	-1.46197	3.54463	8.86e-13	7.73e-11
SBK1	-1.89311	3.15806	1.04e-14	9.06e-13			DSP	-2.22131	6.42985	8.91e-13	7.75e-11
ANKRD52	-1.29493	4.98041	1.11e-14	9.62e-13			EHBP1L1	-1.44137	3.52308	9.98e-13	8.65e-11
AUTS2	-1.64232	2.79416	1.34e-14	1.16e-12			TUBGCP6	-1.24638	4.53011	1.1e-12	9.53e-11
ME1	-1.07014	6.95478	1.34e-14	1.16e-12			ARHGAP39	-1.52166	2.50556	1.23e-12	1.05e-10
PRPF8	-1.07334	7.51916	1.38e-14	1.19e-12			MKI67	-3.28039	2.5208	1.25e-12	1.07e-10
IGSF9B	-1.79524	1.80434	1.38e-14	1.19e-12			SMG6	-1.29225	4.58879	1.3e-12	1.11e-10
ARFGEF3	-1.27966	6.5006	1.45e-14	1.24e-12			ARHGAP35	-1.14661	6.45104	1.32e-12	1.12e-10
APC2	-1.69199	3.30404	1.63e-14	1.39e-12			KMT2A	-1.96946	4.34492	1.33e-12	1.13e-10
IGF2R	-1.22801	7.758	1.68e-14	1.43e-12			SREBF1	-1.10821	8.05489	1.53e-12	1.29e-10
UNC5B	-1.71491	2.46979	1.7e-14	1.44e-12			UPF1	-1.02045	6.16896	1.54e-12	1.3e-10
WNK1	-1.46669	5.78434	1.86e-14	1.57e-12			MAST2	-1.22874	3.98655	1.64e-12	1.38e-10
ADORA2A-AS1	-3.82588	-0.227269	1.87e-14	1.57e-12			SEZ6L2	-1.18701	5.55423	1.71e-12	1.43e-10
FOXK1	-1.65835	3.8287	2.04e-14	1.71e-12			BZRAP1	-1.37651	3.60252	1.76e-12	1.47e-10
ITGA3	-1.54667	3.3068	2.05e-14	1.71e-12			SH3PXD2B	-1.25706	3.75297	1.82e-12	1.51e-10
ZWINT	1.07921	6.45294	2.12e-14	1.77e-12			SLC9A1	-1.08588	5.27071	2.02e-12	1.67e-10
HIP1R	-1.18311	5.13218	2.34e-14	1.95e-12			ZNF335	-1.36523	3.55315	2.13e-12	1.75e-10
HTT	-1.1819	5.51661	2.35e-14	1.95e-12			GPATCH8	-1.98241	2.94453	2.18e-12	1.79e-10
FN1	-1.46492	6.5293	2.63e-14	2.18e-12			PLEKHG2	-1.63421	1.77215	2.4e-12	1.96e-10
RPTOR	-1.27929	4.3959	2.72e-14	2.24e-12			KIAA1217	-1.72314	3.5721	2.62e-12	2.14e-10
NLGN2	-1.66184	3.10574	2.79e-14	2.3e-12			XIAP	-1.91505	4.36452	2.73e-12	2.22e-10
KIAA1549	-1.54125	3.59966	2.88e-14	2.36e-12			SMTN	-1.2935	3.84033	2.91e-12	2.36e-10
BRIP1	1.62729	3.13633	3.2e-14	2.61e-12			TEP1	-1.56706	2.52016	2.95e-12	2.38e-10
HJURP	1.23116	4.82146	3.28e-14	2.67e-12			CAD	-1.10133	5.09651	3.55e-12	2.85e-10
COL1A1	-1.54969	3.68582	3.53e-14	2.87e-12			DAB2IP	-1.27037	3.97839	3.6e-12	2.88e-10
PPP1R26	-1.35517	4.04461	3.63e-14	2.94e-12			MED15	-1.2758	4.01638	3.64e-12	2.9e-10
BRDT	1.36998	3.72836	3.99e-14	3.22e-12			NHSL1	-1.66235	1.63051	3.87e-12	3.07e-10
PCK2	-1.11661	7.0483	4.21e-14	3.39e-12			POM121	-1.33926	4.01355	4.07e-12	3.22e-10
ELMSAN1	-1.35615	4.16898	4.32e-14	3.47e-12			MKL1	-1.24629	4.03372	4.38e-12	3.45e-10
FADS2	-1.06022	10.5063	4.55e-14	3.65e-12			INPPL1	-1.0144	5.461	4.9e-12	3.85e-10
ZNF865	-1.54704	3.54463	4.71e-14	3.76e-12			TSHZ1	-1.6157	2.58541	5.3e-12	4.15e-10
CEP131	-1.5361	3.82308	5.2e-14	4.13e-12			TCF20	-1.86481	4.04199	5.31e-12	4.15e-10
SBNO2	-1.20702	6.2292	5.27e-14	4.17e-12			ITGA3	-1.39032	3.3068	5.67e-12	4.42e-10
DAB2IP	-1.37876	3.97839	5.69e-14	4.49e-12			PPP6R1	-1.11654	5.39038	5.71e-12	4.44e-10
LTBP4	-1.23683	5.05871	5.88e-14	4.61e-12			TTC28	-1.66563	2.14074	5.79e-12	4.49e-10
DOCK6	-1.44402	3.89059	5.89e-14	4.61e-12			KIF1C	-1.00862	7.05881	5.96e-12	4.61e-10
ZBTB7A	-1.31956	3.92133	5.89e-14	4.61e-12			ADM2	-1.11164	5.38807	6.06e-12	4.67e-10
BPNT1	-1.5366	4.3088	5.92e-14	4.62e-12			RUSC2	-1.3811	2.93591	6.19e-12	4.76e-10
FBXO5	1.35332	3.76413	6.69e-14	5.21e-12			PXDN	-1.34428	3.66088	6.35e-12	4.87e-10
WDR76	1.21734	4.76536	6.86e-14	5.32e-12			LMTK2	-1.19644	4.62438	6.41e-12	4.9e-10
SLC9A1	-1.15823	5.27071	6.96e-14	5.38e-12			CELSR3	-1.79883	1.74299	6.95e-12	5.3e-10
TMEM63C	-1.50068	2.85691	7.39e-14	5.69e-12			EHMT1	-1.41335	5.19427	7.05e-12	5.36e-10
ACSS2	-1.05852	6.99956	8.05e-14	6.17e-12			LTBP4	-1.1269	5.05871	7.08e-12	5.37e-10
ATF4	-1.0081	8.84428	8.14e-14	6.23e-12			INF2	-1.36529	4.07487	7.5e-12	5.67e-10
BZRAP1	-1.45969	3.60252	8.28e-14	6.31e-12			PHF2	-1.11301	5.01743	8.13e-12	6.13e-10
ABL1	-1.21627	5.23463	8.7e-14	6.6e-12			LMX1B	-1.52795	2.04573	8.57e-12	6.44e-10
PML	-1.58036	2.76831	8.88e-14	6.71e-12			NPTXR	-1.23309	4.59869	9.1e-12	6.83e-10
MND1	1.53016	2.42405	9.61e-14	7.22e-12			CUL9	-1.13998	4.57206	9.26e-12	6.93e-10
RUSC2	-1.49517	2.93591	9.85e-14	7.39e-12			PER2	-1.54351	2.03089	9.57e-12	7.14e-10
CUX1	-1.22631	5.41331	9.93e-14	7.43e-12			ELFN2	-1.5884	1.97897	9.64e-12	7.15e-10
SH3PXD2A	-1.48016	4.11902	1.01e-13	7.52e-12			GLTSCR1	-1.50027	2.12782	9.97e-12	7.37e-10
FLII	-1.01884	7.03849	1.05e-13	7.84e-12			CABLES2	-1.34761	2.95276	1.03e-11	7.58e-10
PACS2	-1.19088	5.19755	1.29e-13	9.58e-12			INCENP	-1.14197	3.93892	1.21e-11	8.9e-10
NEK8	-1.38676	3.77161	1.29e-13	9.58e-12			PPP1R26	-1.20954	4.04461	1.27e-11	9.33e-10
SMCR8	-1.33938	4.09796	1.38e-13	1.02e-11			VPS53	-1.1698	4.66003	1.3e-11	9.54e-10
ZNF629	-2.18907	2.55097	1.39e-13	1.02e-11			SBNO2	-1.07745	6.2292	1.66e-11	1.21e-09
SREBF1	-1.15903	8.05489	1.5e-13	1.1e-11			PPARGC1B	-1.34539	2.77999	1.66e-11	1.21e-09
TNS2	-1.40334	3.9254	1.57e-13	1.15e-11			CGN	-1.40055	3.74154	1.68e-11	1.22e-09
ABCA3	-1.24004	4.75148	1.6e-13	1.16e-11			UBN1	-1.04967	5.26735	1.8e-11	1.31e-09
ATXN1	-1.3205	3.44618	1.64e-13	1.19e-11			MAPKBP1	-1.36083	3.05271	1.81e-11	1.31e-09
KIAA1683	-2.64083	0.253022	1.71e-13	1.24e-11			ABCA3	-1.12743	4.75148	1.82e-11	1.31e-09
KLHL21	-1.10331	6.79633	1.77e-13	1.28e-11			TNRC6C	-1.68442	2.17009	1.93e-11	1.39e-09
LMTK2	-1.28476	4.62438	1.8e-13	1.29e-11			MAP3K9	-1.18542	4.03728	2.04e-11	1.46e-09
MYLK	-1.40397	6.86792	1.8e-13	1.29e-11			ARHGEF17	-1.24124	4.49316	2.16e-11	1.54e-09
FDPS	-1.03302	7.35102	1.81e-13	1.29e-11			ZMIZ2	-1.18607	4.85032	2.61e-11	1.86e-09
MCM10	1.56525	4.09976	1.97e-13	1.41e-11			LOC644794	-4.12733	-0.336607	2.68e-11	1.9e-09
CAMK1D	-1.26963	3.71569	2.03e-13	1.45e-11			CHD8	-1.48071	4.99901	3.01e-11	2.14e-09
AHRR	-1.96347	1.05389	2.1e-13	1.5e-11			ADAMTS7	-1.49847	2.01456	3.09e-11	2.18e-09
TYMS	1.15905	5.24908	2.11e-13	1.5e-11			SYMPK	-1.16033	4.63117	3.12e-11	2.2e-09
MICAL3	-1.46072	4.04848	2.12e-13	1.5e-11			EDC4	-1.0854	4.54594	3.57e-11	2.51e-09
WASH5P	-1.48081	4.72522	2.29e-13	1.62e-11			CAMSAP3	-1.26717	4.29236	4.1e-11	2.87e-09
LAMC3	-1.41119	3.53968	2.31e-13	1.62e-11			GPRIN1	-1.339	2.93894	4.1e-11	2.87e-09
FAM65A	-1.55946	3.5187	2.54e-13	1.78e-11			WDR62	-1.24866	2.80225	4.61e-11	3.22e-09
SPTBN5	-1.89449	2.87306	2.56e-13	1.79e-11			SMCR8	-1.18979	4.09796	4.72e-11	3.29e-09
LENG8	-1.31399	3.95683	2.63e-13	1.84e-11			PPP1R13L	-1.47221	1.83545	4.97e-11	3.45e-09
SYNGAP1	-1.63188	2.55184	2.74e-13	1.91e-11			ERC1	-1.58764	4.18544	5.13e-11	3.55e-09
TSHZ1	-1.71436	2.58541	2.83e-13	1.97e-11			CCDC85C	-1.02617	6.43497	5.35e-11	3.69e-09
MDC1	-1.93985	2.83225	2.87e-13	1.99e-11			ZFYVE26	-1.11438	4.57795	6.41e-11	4.4e-09
UAP1L1	-1.1111	6.50417	3.11e-13	2.15e-11			DCAF16	-1.51719	3.99295	6.53e-11	4.47e-09
TUBGCP6	-1.27795	4.53011	3.16e-13	2.18e-11			CHD4	-1.17969	6.75441	6.54e-11	4.47e-09
GLDN	-1.55249	1.83168	3.19e-13	2.19e-11			GAB2	-2.06039	0.886574	6.71e-11	4.58e-09
RGAG4	-1.50529	2.74298	3.27e-13	2.25e-11			KIAA0195	-1.13576	4.37234	6.77e-11	4.61e-09
ELFN2	-1.68899	1.97897	3.37e-13	2.31e-11			WWC1	-1.1105	5.09514	6.84e-11	4.64e-09
ADORA2A	-4.66784	-0.852933	3.42e-13	2.33e-11			ADAMTS13	-1.29897	2.66501	7.78e-11	5.26e-09
SEZ6L2	-1.22288	5.55423	3.88e-13	2.64e-11			CAMSAP1	-1.03496	5.23456	8.25e-11	5.56e-09
FLYWCH1	-1.27216	4.61734	4.45e-13	3.02e-11			TANC2	-1.28528	3.67743	8.37e-11	5.63e-09
DIDO1	-1.26633	5.56114	4.54e-13	3.08e-11			SETD5	-1.19057	5.11397	8.6e-11	5.77e-09
FAM83G	-1.20658	4.97687	4.58e-13	3.1e-11			MAN2A2	-1.06497	4.80265	8.64e-11	5.78e-09
NUSAP1	1.02621	6.46295	4.65e-13	3.13e-11			CDK13	-1.1943	4.45083	8.74e-11	5.83e-09
ZNF618	-1.38959	3.77017	4.81e-13	3.24e-11			CEP250	-1.92717	3.15239	9.97e-11	6.62e-09
RFX1	-1.81608	1.55387	5e-13	3.35e-11			ITPRIPL2	-1.31773	3.11635	1.15e-10	7.6e-09
ZMIZ2	-1.28768	4.85032	5.03e-13	3.36e-11			KIAA1671	-1.04753	5.47973	1.21e-10	7.93e-09
RNF187	-1.12206	9.43925	5.28e-13	3.51e-11			ASXL2	-1.39668	3.84137	1.23e-10	8.1e-09
ZNF517	-1.77762	2.09096	6.2e-13	4.12e-11			ESPL1	-1.16685	3.48755	1.5e-10	9.8e-09
TULP4	-1.33127	3.72997	7.2e-13	4.76e-11			MAP1S	-1.19392	4.81503	1.58e-10	1.03e-08
GAB2	-2.24454	0.886574	7.2e-13	4.76e-11			AKAP13	-1.66526	3.68764	1.62e-10	1.05e-08
ARHGAP39	-1.54493	2.50556	8.07e-13	5.31e-11			PHLPP1	-1.12157	3.55799	1.63e-10	1.06e-08
SPC25	1.42821	3.74804	8.11e-13	5.32e-11			JRK	-1.13945	4.2812	1.73e-10	1.12e-08
ORC1	1.4041	3.41627	8.71e-13	5.7e-11			PRR36	-1.45483	4.02133	1.85e-10	1.2e-08
ZC3H4	-1.37703	4.13827	9.04e-13	5.9e-11			CRMP1	-2.53411	0.41671	2.1e-10	1.35e-08
PHF2	-1.16392	5.01743	9.52e-13	6.2e-11			TICRR	-1.66351	1.78615	2.17e-10	1.39e-08
CCDC85C	-1.11739	6.43497	9.97e-13	6.48e-11			SLX4	-1.88608	2.34598	2.35e-10	1.5e-08
USP36	-1.23487	4.08956	1.06e-12	6.87e-11			BICD2	-1.28447	3.78154	2.39e-10	1.52e-08
FHDC1	-2.83303	1.30725	1.06e-12	6.87e-11			SETBP1	-1.87285	2.19922	2.49e-10	1.58e-08
PTPN14	-1.7297	2.6493	1.14e-12	7.32e-11			ZNF592	-1.10277	4.55645	2.61e-10	1.65e-08
PHF12	-1.13755	5.45009	1.14e-12	7.32e-11			TAF4	-1.3558	2.6072	2.83e-10	1.79e-08
LPP	-1.5726	4.68673	1.14e-12	7.32e-11			ARHGEF10L	-1.19037	3.24821	2.85e-10	1.79e-08
PLEKHH1	-1.48091	4.39622	1.25e-12	7.96e-11			PLEKHG3	-1.13162	4.01454	2.91e-10	1.82e-08
CELSR3	-1.85964	1.74299	1.37e-12	8.67e-11			ATP11A	-1.04493	4.67158	2.91e-10	1.82e-08
NEAT1	-1.22203	6.38936	1.47e-12	9.32e-11			CDK12	-1.29489	5.0964	2.99e-10	1.87e-08
MTCL1	-2.2301	1.71334	1.48e-12	9.36e-11			SUPT6H	-1.14988	6.44741	3.01e-10	1.88e-08
UPF1	-1.02171	6.16896	1.52e-12	9.57e-11			LPIN3	-1.10525	3.73402	3.08e-10	1.92e-08
SCNN1A	-1.03733	5.55016	1.6e-12	1.01e-10			SLC26A1	-1.34154	3.55797	3.11e-10	1.93e-08
GPC1	-1.2507	4.98386	1.76e-12	1.1e-10			MEGF6	-1.18295	3.27885	3.17e-10	1.96e-08
CBFA2T2	-1.46831	4.29504	1.78e-12	1.12e-10			IDUA	-1.35482	2.07805	3.25e-10	2e-08
ZFYVE26	-1.20839	4.57795	1.89e-12	1.18e-10			RAB2B	-2.0853	1.88591	3.54e-10	2.18e-08
ERCC6L	1.49662	3.24803	1.97e-12	1.23e-10			ALPK3	-1.20315	2.71787	3.92e-10	2.41e-08
MCM4	1.05141	6.85421	2.08e-12	1.3e-10			NOP14	-1.47164	4.05935	3.96e-10	2.43e-08
NISCH	-1.01975	5.66605	2.16e-12	1.34e-10			TTYH3	-1.07501	6.36555	4.01e-10	2.45e-08
ZNF592	-1.22899	4.55645	2.18e-12	1.35e-10			DHX37	-1.0877	3.77831	4.01e-10	2.45e-08
ESPN	-1.4534	3.11962	2.25e-12	1.39e-10			PROSER3	-2.50482	0.293147	4.08e-10	2.48e-08
C19orf26	-1.89294	1.77992	2.31e-12	1.42e-10			DOPEY2	-1.06013	4.86293	4.86e-10	2.94e-08
E2F7	1.49669	3.07693	2.67e-12	1.64e-10			NEURL4	-1.09197	4.21264	5.24e-10	3.16e-08
CAMSAP3	-1.34335	4.29236	2.76e-12	1.69e-10			RALGDS	-1.01078	5.36181	5.58e-10	3.35e-08
SESN2	-1.19035	4.60517	2.93e-12	1.79e-10			BCL9	-1.02907	4.44006	5.86e-10	3.51e-08
TTC28	-1.68778	2.14074	3.39e-12	2.06e-10			GPC1	-1.09502	4.98386	6.09e-10	3.62e-08
KLF13	-1.06989	5.77464	3.65e-12	2.22e-10			TNS1	-1.40571	2.33564	6.21e-10	3.69e-08
ZNF319	-1.24933	3.36411	3.89e-12	2.36e-10			VWA2	-1.79053	2.28269	6.32e-10	3.74e-08
MED15	-1.27915	4.01638	3.9e-12	2.36e-10			RNF44	-1.01775	4.60389	6.67e-10	3.94e-08
PANX2	-1.32885	4.13454	3.93e-12	2.37e-10			PACSIN1	-1.09657	4.31677	6.81e-10	4.02e-08
BICD2	-1.41004	3.78154	4.19e-12	2.52e-10			MICALL1	-1.20643	4.156	6.9e-10	4.06e-08
CAPN15	-1.47748	3.66829	4.48e-12	2.68e-10			GOLGB1	-3.06408	5.07987	6.92e-10	4.06e-08
CREB3L2	-1.15024	5.11473	4.68e-12	2.78e-10			BPTF	-2.14571	4.33146	7.54e-10	4.4e-08
KIF1C	-1.0137	7.05881	4.81e-12	2.85e-10			ACIN1	-1.02569	5.86917	7.59e-10	4.41e-08
TNS1	-1.56113	2.33564	5.17e-12	3.06e-10			DHX34	-1.27234	2.70442	8.26e-10	4.79e-08
EHBP1L1	-1.3958	3.52308	5.61e-12	3.31e-10			HDAC7	-1.11507	4.39153	8.42e-10	4.86e-08
MAP1S	-1.28731	4.81503	5.8e-12	3.41e-10			ZSWIM8	-1.09773	4.1902	8.55e-10	4.93e-08
ZC3H3	-1.30031	3.32852	6.04e-12	3.55e-10			ZSWIM1	-2.27008	1.24216	8.8e-10	5.04e-08
MICALL1	-1.34981	4.156	6.11e-12	3.58e-10			ANKRD24	-1.83491	0.713232	8.84e-10	5.06e-08
TANC2	-1.36311	3.67743	6.45e-12	3.77e-10			ZC3H3	-1.15736	3.32852	8.88e-10	5.07e-08
AGT	-1.79396	0.944835	6.88e-12	4.01e-10			LINC00174	-1.92444	1.65678	8.99e-10	5.13e-08
MACF1	-2.23438	4.84491	7.34e-12	4.27e-10			ACACB	-1.17633	2.95402	1.01e-09	5.72e-08
FOXN4	-3.75235	-1.15231	7.36e-12	4.28e-10			FSCN2	-1.42064	2.2615	1.04e-09	5.86e-08
PAX1	-1.30132	3.83831	8.32e-12	4.79e-10			GINS4	-1.6744	1.82424	1.07e-09	6.04e-08
ECE1	-1.30635	3.45368	8.72e-12	5e-10			PEX26	-1.12952	4.97421	1.1e-09	6.19e-08
SKA3	1.08374	5.29505	9.5e-12	5.44e-10			RGAG4	-1.25866	2.74298	1.26e-09	7.07e-08
BHLHE41	-1.37716	2.23588	1.08e-11	6.16e-10			MYH10	-1.87147	5.89014	1.31e-09	7.36e-08
CDC25C	1.25393	3.44872	1.09e-11	6.2e-10			JAG2	-1.07242	5.21709	1.34e-09	7.5e-08
TCOF1	-1.97445	2.83474	1.15e-11	6.51e-10			MAML1	-1.01166	5.06027	1.47e-09	8.16e-08
DEPDC1B	1.07973	4.55185	1.19e-11	6.74e-10			DUXAP10	-1.09918	3.75478	1.47e-09	8.2e-08
AKAP17A	-1.17655	3.77979	1.25e-11	7.04e-10			TP53INP2	-1.03494	4.67809	1.49e-09	8.27e-08
RBSN	-1.59309	3.36729	1.25e-11	7.08e-10			AKAP17A	-1.04723	3.77979	1.52e-09	8.4e-08
ZCCHC14	-1.37262	3.34412	1.35e-11	7.61e-10			KIFC2	-1.02295	4.46041	1.57e-09	8.66e-08
RAD51AP1	1.23943	4.01694	1.45e-11	8.15e-10			TIAF1	-2.77502	-0.225122	1.71e-09	9.41e-08
DOPEY2	-1.15184	4.86293	1.46e-11	8.18e-10			SON	-1.12595	6.80903	1.76e-09	9.67e-08
NDC80	1.32457	4.87423	1.73e-11	9.67e-10			CEP164	-1.17979	2.96777	1.8e-09	9.86e-08
SMARCC2	-1.18223	5.12491	1.91e-11	1.06e-09			C15orf52	-1.07838	4.49861	1.89e-09	1.03e-07
PSMC3IP	1.24795	3.13305	1.94e-11	1.07e-09			ANKRD11	-1.14678	5.26367	1.92e-09	1.05e-07
IRF2BP2	-1.09459	5.14411	2.07e-11	1.15e-09			FAM222B	-1.20339	3.33765	2.15e-09	1.17e-07
ARHGEF10L	-1.26848	3.24821	2.11e-11	1.16e-09			C19orf26	-1.62565	1.77992	2.18e-09	1.19e-07
MKL1	-1.20762	4.03372	2.24e-11	1.23e-09			AFF1	-1.14206	4.24336	2.24e-09	1.21e-07
CTIF	-1.35951	2.35676	2.27e-11	1.25e-09			MDN1	-1.41252	3.37054	2.63e-09	1.42e-07
SETD1A	-1.38581	3.15527	2.28e-11	1.25e-09			EVI5L	-1.08674	5.2334	2.73e-09	1.47e-07
DCHS1	-1.38592	2.839	2.34e-11	1.28e-09			BRPF1	-1.07985	3.15269	2.74e-09	1.47e-07
PLXNB1	-1.15384	4.43994	2.36e-11	1.28e-09			ADORA2A-AS1	-3.17824	-0.227269	2.92e-09	1.56e-07
NCAPG	1.2664	4.40413	2.43e-11	1.32e-09			UNC5B	-1.33253	2.46979	2.93e-09	1.56e-07
EEF2K	-1.27402	3.34382	2.49e-11	1.35e-09			IRS1	-1.06564	4.42155	3.09e-09	1.65e-07
DUXAP10	-1.21504	3.75478	2.53e-11	1.37e-09			GPSM1	-1.07069	5.32824	3.19e-09	1.7e-07
PTPRU	-1.13081	4.96772	2.58e-11	1.39e-09			KCNQ4	-1.70807	1.0617	3.52e-09	1.86e-07
DGKD	-1.14507	4.16308	2.59e-11	1.4e-09			METTL7A	-1.12986	4.62604	3.67e-09	1.94e-07
MAT1A	-1.34189	2.68767	2.78e-11	1.49e-09			LRFN3	-1.11177	3.10464	3.76e-09	1.98e-07
JAKMIP3	-1.49746	2.71998	2.96e-11	1.58e-09			RAVER1	-1.16292	3.52728	4.03e-09	2.12e-07
KIF2C	1.01688	5.12892	3e-11	1.6e-09			PNPLA6	-1.01173	5.29546	4.04e-09	2.12e-07
POM121	-1.28577	4.01355	3.04e-11	1.62e-09			USP36	-1.01602	4.08956	4.14e-09	2.16e-07
ZNF462	-1.53423	4.4374	3.11e-11	1.65e-09			SIPA1L1	-1.16981	4.33946	4.15e-09	2.16e-07
MAP3K10	-1.29386	3.69618	3.12e-11	1.66e-09			PROB1	-1.54286	1.13303	4.51e-09	2.35e-07
KIAA0195	-1.15838	4.37234	3.24e-11	1.72e-09			PRR11	-2.25147	1.3172	5.49e-09	2.83e-07
ZYX	-1.18807	4.57309	3.71e-11	1.96e-09			PCDH1	-1.00288	4.46805	5.54e-09	2.85e-07
KCNQ4	-1.91671	1.0617	3.72e-11	1.96e-09			TNRC6B	-1.15513	5.46749	5.86e-09	3.01e-07
ZFP41	-1.52519	2.48085	3.83e-11	2.02e-09			VHL	-1.27348	3.3546	5.9e-09	3.03e-07
ACACB	-1.27637	2.95402	3.91e-11	2.05e-09			PRRC2C	-1.74399	4.08379	6.46e-09	3.3e-07
MAP3K9	-1.17114	4.03728	3.92e-11	2.05e-09			COBL	-1.20204	3.41579	6.47e-09	3.3e-07
CLCN6	-1.16556	4.14003	4.17e-11	2.18e-09			LRCH3	-1.25866	3.37478	6.55e-09	3.34e-07
VPS53	-1.142	4.66003	4.24e-11	2.21e-09			ADCY3	-1.15005	2.69429	6.96e-09	3.52e-07
MCM7	1.00027	8.12496	4.3e-11	2.24e-09			CTIF	-1.17962	2.35676	7e-09	3.53e-07
ZBTB7B	-1.02302	6.7177	4.33e-11	2.25e-09			TULP4	-1.07254	3.72997	7.16e-09	3.6e-07
EHMT1	-1.35871	5.19427	4.37e-11	2.27e-09			LOC440300	-2.00417	0.175247	7.16e-09	3.6e-07
PRR36	-1.50779	4.02133	4.57e-11	2.37e-09			FBXO41	-1.05922	4.28508	7.34e-09	3.68e-07
ZBTB47	-1.28244	3.71503	5.03e-11	2.6e-09			CNOT3	-1.04042	3.70517	7.36e-09	3.68e-07
SMG6	-1.19719	4.58879	5.14e-11	2.65e-09			ZNF827	-1.22719	3.62516	8.07e-09	4.02e-07
PNPLA6	-1.13155	5.29546	5.14e-11	2.65e-09			NUP214	-1.00129	4.50137	8.14e-09	4.04e-07
SPEN	-2.4445	2.46676	5.24e-11	2.69e-09			C1RL-AS1	-1.44618	1.71967	8.57e-09	4.25e-07
DLGAP4	-1.17496	4.36394	5.46e-11	2.8e-09			PRDM15	-1.23333	3.24165	8.58e-09	4.25e-07
DSN1	1.01385	5.027	5.62e-11	2.88e-09			CENPF	-3.01455	3.43684	8.59e-09	4.25e-07
PRUNE2	-1.58826	9.13623	5.77e-11	2.94e-09			DCHS1	-1.19608	2.839	8.62e-09	4.25e-07
FAM222B	-1.322	3.33765	5.77e-11	2.94e-09			LZTS1	-1.6617	0.491445	8.72e-09	4.3e-07
EVI5L	-1.19905	5.2334	5.83e-11	2.97e-09			URB1	-1.01134	4.40937	9.53e-09	4.67e-07
ARHGAP35	-1.05694	6.45104	6.08e-11	3.08e-09			IGSF9	-1.01176	3.56689	9.87e-09	4.82e-07
FSCN2	-1.52264	2.2615	6.18e-11	3.12e-09			CAMTA2	-1.18968	3.45037	1e-08	4.88e-07
MAN2B2	-1.06313	4.34232	6.33e-11	3.19e-09			RFX1	-1.47347	1.55387	1.02e-08	4.99e-07
CENPK	1.28061	2.89982	6.37e-11	3.2e-09			CPT1A	-1.23082	5.53065	1.03e-08	5.01e-07
SGSM2	-1.05732	5.13069	6.51e-11	3.26e-09			LOC101060429	-4.64667	-1.22317	1.09e-08	5.3e-07
PC	-1.04487	4.90436	6.67e-11	3.33e-09			ADORA2A	-3.97654	-0.852933	1.14e-08	5.51e-07
MAPKBP1	-1.33068	3.05271	7e-11	3.49e-09			IPO5P1	-1.99413	0.848885	1.15e-08	5.53e-07
HAUS8	1.11668	3.86755	7.09e-11	3.53e-09			LINGO4	-1.9077	0.706612	1.35e-08	6.49e-07
DISP2	-1.30865	2.8914	7.23e-11	3.59e-09			GLUD1P3	-1.88999	0.0614318	1.38e-08	6.62e-07
CUL9	-1.09559	4.57206	7.42e-11	3.68e-09			ARHGEF18	-1.40026	3.53767	1.38e-08	6.62e-07
ALPK3	-1.25868	2.71787	7.57e-11	3.75e-09			TRAK1	-1.00104	3.88285	1.42e-08	6.81e-07
IL17RA	-1.07984	4.32004	7.71e-11	3.8e-09			GLIS2	-1.28946	2.31759	1.48e-08	7.07e-07
BCL9	-1.08314	4.44006	7.73e-11	3.81e-09			MIR4664	-2.15618	0.410626	1.56e-08	7.4e-07
ADCY9	-1.1953	3.84261	8.04e-11	3.95e-09			ANKRD13B	-1.12689	2.81108	1.61e-08	7.66e-07
SHCBP1	1.04437	4.68783	8.36e-11	4.1e-09			IFT140	-1.05569	2.98225	1.75e-08	8.17e-07
CAD	-1.02929	5.09651	8.68e-11	4.25e-09			CNNM1	-1.08765	3.17826	1.75e-08	8.18e-07
GPSM1	-1.17537	5.32824	8.72e-11	4.26e-09			MAST4	-1.09261	3.15007	1.9e-08	8.88e-07
PLEKHG2	-1.52882	1.77215	8.73e-11	4.26e-09			ZNF628	-1.64724	1.81139	1.91e-08	8.9e-07
TCF20	-1.75017	4.04199	9.13e-11	4.44e-09			ZNF777	-1.00491	4.1751	1.94e-08	8.99e-07
ITPRIPL2	-1.3306	3.11635	9.39e-11	4.56e-09			FAT1	-1.25148	6.66483	1.95e-08	9.02e-07
TMEM184A	-1.0012	5.29825	1.01e-10	4.89e-09			GREB1	-1.06169	2.66013	1.96e-08	9.08e-07
UBE2C	1.18776	5.3751	1.02e-10	4.95e-09			FAM20B	-1.33548	3.40071	2.07e-08	9.55e-07
RALGDS	-1.05361	5.36181	1.08e-10	5.21e-09			MYO5B	-1.34386	3.65355	2.2e-08	1.01e-06
RMI2	1.36046	3.58802	1.08e-10	5.22e-09			PGAM5	-1.16811	4.14197	2.24e-08	1.03e-06
POLE2	1.15913	3.38203	1.13e-10	5.44e-09			SRRM1	-1.11504	4.72765	2.46e-08	1.13e-06
RRP12	-1.05796	5.12067	1.14e-10	5.45e-09			MED13L	-1.12055	4.16386	2.47e-08	1.13e-06
MAN2A2	-1.05922	4.80265	1.18e-10	5.62e-09			STK10	-1.07382	3.09254	2.5e-08	1.14e-06
CAMSAP1	-1.02655	5.23456	1.24e-10	5.91e-09			KCNC3	-1.88793	0.269494	2.56e-08	1.16e-06
SNED1	-1.32801	2.78418	1.27e-10	6.03e-09			JAKMIP3	-1.25663	2.71998	2.68e-08	1.22e-06
MIR4461	-1.6774	4.7041	1.32e-10	6.26e-09			ATXN2	-1.11466	3.54494	2.77e-08	1.25e-06
FANCB	1.61325	1.3817	1.38e-10	6.56e-09			ZFP41	-1.2805	2.48085	3.11e-08	1.39e-06
DSP	-1.97926	6.42985	1.39e-10	6.6e-09			AGAP1	-1.01849	3.43743	3.39e-08	1.51e-06
AURKB	1.34557	4.43043	1.44e-10	6.83e-09			PLEKHM1P	-1.34595	1.42299	3.49e-08	1.55e-06
LRFN3	-1.21155	3.10464	1.45e-10	6.84e-09			SOBP	-1.45734	1.16781	3.61e-08	1.6e-06
EVL	-1.01245	4.95875	1.45e-10	6.84e-09			MAGI1	-1.26105	4.25668	3.61e-08	1.6e-06
POLA2	1.08243	4.7007	1.47e-10	6.94e-09			PREX1	-1.18888	2.00658	3.67e-08	1.62e-06
ZNF335	-1.24841	3.55315	1.49e-10	7.01e-09			MAP3K14	-1.393	1.58306	3.81e-08	1.68e-06
CDK13	-1.17886	4.45083	1.65e-10	7.72e-09			ICAM5	-1.09688	2.47555	4.09e-08	1.79e-06
GMNN	1.03161	4.83419	1.67e-10	7.81e-09			PDXDC2P	-2.41729	-0.45715	4.18e-08	1.83e-06
E2F1	1.24933	5.86668	1.71e-10	8.01e-09			SH3RF3	-1.57932	0.822856	4.18e-08	1.83e-06
EGFR	-1.24505	4.999	1.73e-10	8.06e-09			CACTIN	-1.06953	3.76767	4.32e-08	1.88e-06
LINC00319	-1.22534	3.0746	1.8e-10	8.4e-09			RBM19	-1.12415	3.22402	4.83e-08	2.09e-06
MVK	-1.02523	4.93734	1.83e-10	8.53e-09			USP42	-1.3448	3.00847	4.89e-08	2.11e-06
NCAPH	1.11426	4.34478	1.84e-10	8.54e-09			IGSF9B	-1.29555	1.80434	5.06e-08	2.18e-06
RAB2B	-2.12442	1.88591	1.84e-10	8.54e-09			ADAMTSL4	-1.35597	1.34869	5.43e-08	2.33e-06
OSBPL5	-1.00534	5.68912	1.87e-10	8.66e-09			PDZD4	-1.04828	2.98881	6.13e-08	2.62e-06
CD4	-2.47679	-0.298883	1.89e-10	8.74e-09			ZBTB40	-1.01299	4.32024	6.13e-08	2.62e-06
SLC29A2	-1.09593	4.36528	1.95e-10	8.99e-09			PITPNM2	-1.2249	1.96777	6.14e-08	2.62e-06
ZNF710	-1.23028	3.32089	2.09e-10	9.57e-09			SPATA13	-1.2148	3.60484	6.18e-08	2.63e-06
DMRT1	-1.49321	1.15554	2.09e-10	9.57e-09			PLEKHA7	-1.13456	2.83086	6.27e-08	2.66e-06
OPLAH	-1.02	4.78252	2.23e-10	1.02e-08			FBXL18	-1.19954	2.9677	6.58e-08	2.79e-06
SKA1	1.25203	2.88096	2.23e-10	1.02e-08			PLCB3	-1.05776	2.98969	7.07e-08	2.99e-06
ATF3	-1.13081	4.05903	2.27e-10	1.03e-08			CASC5	-2.06437	2.54725	7.35e-08	3.09e-06
TEP1	-1.4352	2.52016	2.29e-10	1.04e-08			SIK2	-1.07853	3.67578	7.55e-08	3.17e-06
XIAP	-1.72874	4.36452	2.4e-10	1.09e-08			NPIPB3	-2.74056	-0.637024	7.77e-08	3.25e-06
MTFR2	1.33116	2.54239	2.42e-10	1.09e-08			SNED1	-1.10694	2.78418	8.45e-08	3.53e-06
AP5Z1	-1.0877	4.92062	2.43e-10	1.1e-08			TMEM63C	-1.07744	2.85691	8.83e-08	3.69e-06
RAD54L	1.31935	3.07817	2.74e-10	1.23e-08			PITPNM3	-1.07375	2.36408	9.34e-08	3.88e-06
ZNF777	-1.1317	4.1751	2.77e-10	1.24e-08			COL18A1	-1.14629	2.14243	9.94e-08	4.13e-06
PVRL1	-1.09823	4.80222	2.9e-10	1.3e-08			PANX2	-1.01731	4.13454	1.04e-07	4.3e-06
CABLES2	-1.25648	2.95276	3.04e-10	1.35e-08			NSD1	-1.15567	6.54702	1.05e-07	4.32e-06
PRIM2	1.01031	4.47793	3.38e-10	1.49e-08			ZFHX4	-1.69988	3.20037	1.08e-07	4.44e-06
RBM19	-1.29495	3.22402	3.48e-10	1.53e-08			KMT2C	-1.38497	5.99206	1.11e-07	4.55e-06
MCM5	1.06719	6.6367	3.54e-10	1.56e-08			SEPN1	-1.03865	4.83229	1.11e-07	4.56e-06
SYMPK	-1.09829	4.63117	3.56e-10	1.56e-08			NCOR1	-1.59373	5.59981	1.12e-07	4.57e-06
DHX37	-1.09412	3.77831	3.58e-10	1.57e-08			ZNF320	-1.03796	4.06369	1.15e-07	4.68e-06
SETD5	-1.15114	5.11397	3.61e-10	1.58e-08			ZNF608	-1.48247	2.42241	1.19e-07	4.85e-06
ATAD2	1.21675	6.21186	3.68e-10	1.61e-08			ARHGAP17	-1.04349	3.40753	1.2e-07	4.87e-06
MAST2	-1.09394	3.98655	3.84e-10	1.68e-08			MAP1A	-3.03246	-0.504555	1.2e-07	4.87e-06
GPR19	2.19114	0.0454694	3.89e-10	1.69e-08			PEG3	-1.22359	1.49125	1.28e-07	5.15e-06
ATP13A2	-1.03394	5.28633	3.94e-10	1.71e-08			MAMDC4	-1.45785	0.814558	1.28e-07	5.17e-06
ARHGEF17	-1.16079	4.49316	3.97e-10	1.72e-08			TNC	-1.38474	1.4379	1.29e-07	5.19e-06
NDUFA4L2	-1.51003	2.03287	4.06e-10	1.76e-08			LOC100288152	-1.09472	2.39778	1.3e-07	5.21e-06
TNRC6C	-1.5822	2.17009	4.27e-10	1.84e-08			ZMYND8	-1.4645	3.91001	1.38e-07	5.52e-06
JRK	-1.11724	4.2812	4.31e-10	1.86e-08			GON4L	-1.22408	3.81833	1.38e-07	5.53e-06
CCNE2	1.12337	4.02034	4.92e-10	2.11e-08			METTL16	-1.25777	4.03673	1.46e-07	5.84e-06
HERC1	-1.41285	5.4939	4.99e-10	2.14e-08			TLN2	-1.58211	1.06087	1.5e-07	5.96e-06
TK1	1.02818	7.96103	5.1e-10	2.18e-08			HYI	-2.53285	-0.492634	1.56e-07	6.19e-06
HELLS	1.33277	3.20563	5.18e-10	2.21e-08			MAP3K10	-1.01787	3.69618	1.6e-07	6.34e-06
CLCN7	-1.07125	4.41567	5.2e-10	2.22e-08			SASH1	-1.08994	4.28007	1.63e-07	6.46e-06
KIAA1671	-1.01154	5.47973	5.25e-10	2.23e-08			ATG9B	-1.0707	2.37638	1.75e-07	6.93e-06
TRIM2	-1.16096	5.17722	5.26e-10	2.23e-08			HEATR3	-1.0039	3.44022	1.82e-07	7.18e-06
NICN1	-1.90449	1.3536	5.5e-10	2.33e-08			FAM222A	-1.06118	2.93112	1.85e-07	7.29e-06
DHX34	-1.29491	2.70442	5.58e-10	2.36e-08			L1CAM	-1.60115	0.59909	1.9e-07	7.46e-06
PER2	-1.41987	2.03089	6.29e-10	2.65e-08			TENM2	-1.70145	0.635139	1.94e-07	7.6e-06
RNF44	-1.02096	4.60389	6.45e-10	2.72e-08			KAT6A	-1.27416	4.62873	1.98e-07	7.73e-06
LOC101060429	-4.93786	-1.22317	6.5e-10	2.73e-08			CRAMP1L	-1.31667	1.98822	2.03e-07	7.92e-06
GLTSCR1	-1.37715	2.12782	6.59e-10	2.77e-08			RGS12	-1.00209	3.77963	2.04e-07	7.94e-06
ERC1	-1.48935	4.18544	7.19e-10	3.01e-08			PPRC1	-1.08559	3.57659	2.12e-07	8.23e-06
ANKRD11	-1.17788	5.26367	7.28e-10	3.05e-08			PDDC1	-1.29643	3.22733	2.14e-07	8.31e-06
ARHGEF40	-1.13497	3.71324	7.48e-10	3.13e-08			ZNF836	-1.98941	0.0186381	2.16e-07	8.36e-06
PRIM1	1.10569	3.71622	7.57e-10	3.16e-08			TRIM66	-1.20123	2.14014	2.2e-07	8.51e-06
SOX9	-1.15088	3.16642	8.52e-10	3.55e-08			FAM229A	-1.74049	0.369724	2.33e-07	8.96e-06
DIP2C	-1.06193	4.52964	8.75e-10	3.62e-08			ZDHHC8	-1.03708	3.32867	2.36e-07	9.06e-06
C15orf39	-1.17405	3.58827	8.94e-10	3.7e-08			TNRC6C-AS1	-1.17314	1.64923	2.4e-07	9.18e-06
PPP1R13B	-1.07616	4.00349	9.07e-10	3.75e-08			SCAF4	-1.18343	2.40736	2.46e-07	9.43e-06
KCNG1	-1.27795	2.04097	9.43e-10	3.89e-08			GRIN1	-1.34171	1.95846	2.65e-07	1.01e-05
GIT1	-1.04666	4.95431	9.56e-10	3.93e-08			KIAA1683	-1.98852	0.253022	2.77e-07	1.05e-05
KIFC2	-1.03927	4.46041	9.56e-10	3.93e-08			NICN1	-1.58088	1.3536	3.02e-07	1.14e-05
SUPT6H	-1.11654	6.44741	9.57e-10	3.93e-08			HERC1	-1.15705	5.4939	3.12e-07	1.17e-05
CNNM1	-1.18045	3.17826	9.83e-10	4.03e-08			TNFAIP8L1	-1.47575	0.609233	3.38e-07	1.27e-05
AGAP1	-1.13034	3.43743	1.02e-09	4.17e-08			TUBB4A	-1.11653	2.96922	3.56e-07	1.33e-05
ADAMTS7	-1.39801	2.01456	1.04e-09	4.25e-08			AHR	-1.57114	1.49206	3.62e-07	1.35e-05
SIPA1L2	-1.489	1.79502	1.05e-09	4.27e-08			CHD7	-1.62341	1.81699	3.71e-07	1.38e-05
ASXL2	-1.32372	3.84137	1.08e-09	4.37e-08			SETD2	-1.63045	3.23629	3.77e-07	1.4e-05
NPTXR	-1.10899	4.59869	1.1e-09	4.42e-08			ZFP30	-1.94157	1.20552	4.04e-07	1.5e-05
SLC1A4	-1.07507	3.4327	1.12e-09	4.52e-08			ZNF587B	-1.49497	1.0636	4.08e-07	1.5e-05
PROB1	-1.61763	1.13303	1.16e-09	4.67e-08			RECQL4	-1.00705	4.7154	4.14e-07	1.52e-05
STARD4	-1.05603	4.93169	1.18e-09	4.73e-08			TAF3	-1.49517	1.78838	4.25e-07	1.56e-05
OIP5	1.06935	4.27138	1.19e-09	4.78e-08			EIF4G3	-1.40019	4.6482	4.54e-07	1.67e-05
ZNF320	-1.19289	4.06369	1.2e-09	4.79e-08			FAM155B	-1.01897	3.74337	4.62e-07	1.69e-05
AFF1	-1.15949	4.24336	1.31e-09	5.24e-08			PLEKHG5	-1.01122	2.35744	4.74e-07	1.74e-05
NEURL4	-1.07008	4.21264	1.32e-09	5.27e-08			MLLT4	-1.07663	4.54432	4.8e-07	1.76e-05
ADAMTS13	-1.22268	2.66501	1.38e-09	5.5e-08			ANO8	-1.04099	2.69802	5.2e-07	1.89e-05
PPP1R13L	-1.36779	1.83545	1.49e-09	5.9e-08			TMEM131	-1.20902	3.81841	5.26e-07	1.91e-05
CEP164	-1.19029	2.96777	1.49e-09	5.93e-08			CCDC120	-1.03099	2.96515	5.27e-07	1.91e-05
CDKN2C	1.00885	5.27558	1.53e-09	6.05e-08			HFE	-1.06768	2.40905	5.3e-07	1.92e-05
SAP130	-1.01789	4.08598	1.76e-09	6.96e-08			PRUNE2	-1.20432	9.13623	5.32e-07	1.92e-05
CCDC154	-2.16872	0.729794	1.79e-09	7.05e-08			ARHGEF5	-1.20664	2.44217	5.39e-07	1.95e-05
SH3PXD2B	-1.07841	3.75297	1.8e-09	7.11e-08			CCDC144B	-2.28417	0.0641941	5.73e-07	2.06e-05
AFAP1	-1.05942	4.00251	1.85e-09	7.27e-08			KLHL29	-1.23683	1.4162	6.45e-07	2.3e-05
SLX4	-1.79479	2.34598	1.86e-09	7.31e-08			UTRN	-1.81824	4.89187	6.67e-07	2.38e-05
CACTIN	-1.17362	3.76767	1.94e-09	7.59e-08			ALMS1	-1.81822	2.46898	7.12e-07	2.53e-05
ZSWIM1	-2.24024	1.24216	2e-09	7.79e-08			NOS1AP	-1.83317	0.0172242	7.71e-07	2.72e-05
IGSF9	-1.05911	3.56689	2.03e-09	7.9e-08			SH3D21	-1.30883	1.09545	7.73e-07	2.73e-05
PLEKHG3	-1.07988	4.01454	2.09e-09	8.14e-08			HIC1	-6.42754	-2.08173	8.37e-07	2.93e-05
HIP1	-1.19098	5.4783	2.11e-09	8.18e-08			LOC101927487	-2.60481	0.00853251	9.15e-07	3.19e-05
AKAP13	-1.56074	3.68764	2.12e-09	8.22e-08			ASAP1	-1.02459	3.39831	9.63e-07	3.35e-05
LTBP1	-1.0516	3.84998	2.21e-09	8.54e-08			LRP5L	-1.11489	1.63903	1.01e-06	3.49e-05
MAGT1	-1.19159	5.86224	2.25e-09	8.69e-08			SRGAP3	-1.10896	2.26668	1.05e-06	3.63e-05
KMT2A	-1.65044	4.34492	2.28e-09	8.8e-08			SDK2	-1.78238	0.419903	1.07e-06	3.69e-05
NOP14	-1.40319	4.05935	2.4e-09	9.22e-08			PRKAR2A	-1.23873	4.03634	1.1e-06	3.77e-05
ZSWIM8	-1.06946	4.1902	2.48e-09	9.5e-08			GPR157	-1.28865	1.58286	1.12e-06	3.85e-05
DIO3	-2.11087	-0.314609	2.53e-09	9.67e-08			UNC5A	-1.01991	2.60093	1.15e-06	3.93e-05
GPATCH8	-1.68683	2.94453	2.57e-09	9.84e-08			AKAP9	-2.47224	4.06586	1.17e-06	3.97e-05
VASN	-1.08754	4.49117	2.66e-09	1.02e-07			LINC01521	-1.02251	2.23555	1.23e-06	4.17e-05
NLRC5	-1.4782	1.57089	2.71e-09	1.03e-07			PINK1-AS	-2.31668	-0.550383	1.25e-06	4.23e-05
LOC644794	-3.78605	-0.336607	2.73e-09	1.04e-07			PMS2CL	-1.064	2.9223	1.4e-06	4.7e-05
ZNF598	-1.03702	4.7323	2.8e-09	1.06e-07			MUC6	-3.05313	-1.45143	1.44e-06	4.82e-05
TRERF1	-1.33748	3.32411	3.08e-09	1.17e-07			C22orf46	-1.51009	3.40658	1.45e-06	4.84e-05
KIFC1	1.0083	5.19019	3.13e-09	1.18e-07			GOLGA2	-1.05896	4.77441	1.53e-06	5.05e-05
VRK1	1.02784	4.27609	3.24e-09	1.22e-07			MIR3648-1	-2.69402	0.0953608	1.61e-06	5.31e-05
CLEC16A	-1.0368	3.64711	3.44e-09	1.29e-07			FRMPD1	-1.17701	2.14605	1.64e-06	5.38e-05
GLIS2	-1.35264	2.31759	3.75e-09	1.39e-07			GAS2L3	-1.80848	0.489127	1.68e-06	5.49e-05
PRDM15	-1.2676	3.24165	3.81e-09	1.42e-07			SEMA4G	-1.47007	0.539731	1.72e-06	5.63e-05
KRBA1	-1.25408	2.25461	3.83e-09	1.42e-07			ZNF318	-1.01747	4.28248	1.75e-06	5.73e-05
ATP2A3	-1.1171	3.02363	4.03e-09	1.49e-07			RBBP8NL	-1.0864	2.24966	1.78e-06	5.78e-05
ARHGAP9	-2.46318	-0.82052	4.48e-09	1.65e-07			APOL6	-2.40353	0.463614	1.83e-06	5.93e-05
ARHGEF2	-1.05029	4.19865	4.51e-09	1.65e-07			C10orf91	-2.27753	-0.532964	1.93e-06	6.25e-05
ARHGEF18	-1.44289	3.53767	4.95e-09	1.81e-07			COL12A1	-1.27	2.66036	1.98e-06	6.38e-05
DCAF16	-1.35796	3.99295	5.01e-09	1.83e-07			PER1	-1.06701	2.16984	2.09e-06	6.7e-05
POLE	-1.05398	4.15905	5.51e-09	2e-07			MASP2	-2.19671	-0.466137	2.15e-06	6.86e-05
MASTL	1.0142	4.17025	5.76e-09	2.09e-07			RAPH1	-1.16784	1.6972	2.27e-06	7.22e-05
MYO5B	-1.39878	3.65355	5.93e-09	2.14e-07			ASH1L	-1.42678	5.17867	2.42e-06	7.68e-05
INF2	-1.16205	4.07487	6.41e-09	2.3e-07			LRRC16B	-2.00344	-0.521229	2.65e-06	8.34e-05
CAMTA2	-1.20838	3.45037	6.6e-09	2.37e-07			DNMBP	-1.08749	1.65782	2.67e-06	8.4e-05
L1CAM	-1.77295	0.59909	6.62e-09	2.37e-07			CRIPAK	-1.09033	1.5739	2.72e-06	8.52e-05
NHSL1	-1.42612	1.63051	6.74e-09	2.41e-07			GK5	-1.39177	2.09172	2.73e-06	8.54e-05
UGT2B17	1.17114	2.43153	6.81e-09	2.43e-07			KAT6B	-1.38406	4.02019	2.78e-06	8.69e-05
ANKRD13B	-1.15859	2.81108	7.23e-09	2.58e-07			MYRF	-1.11279	1.59592	2.99e-06	9.29e-05
IDUA	-1.2596	2.07805	7.53e-09	2.68e-07			ONECUT2	-1.07648	2.55617	3.22e-06	9.95e-05
PCNT	-1.67054	3.622	7.83e-09	2.78e-07			HOXA6	-1.63861	-0.0744775	3.37e-06	0.000103874
SMTN	-1.07187	3.84033	8.1e-09	2.88e-07			MMACHC	-1.23369	2.09224	3.43e-06	0.000105392
KCNC3	-1.96468	0.269494	8.89e-09	3.14e-07			RPS4Y1	-4.29578	-2.34014	3.43e-06	0.000105392
PLEKHN1	-1.07351	3.2066	8.94e-09	3.16e-07			LOC100507373	-1.81148	-0.217678	3.49e-06	0.000106895
CCDC88C	-1.20178	4.07196	9.23e-09	3.25e-07			MST1	-1.43711	0.872774	3.67e-06	0.000112071
ZNF836	-2.15084	0.0186381	9.65e-09	3.39e-07			GNL3L	-1.10034	2.8695	3.87e-06	0.000117331
HFE	-1.21773	2.40905	1.03e-08	3.61e-07			BOD1L1	-1.71036	3.27656	3.92e-06	0.000118601
CEP55	1.00119	4.33373	1.07e-08	3.73e-07			DOK3	-1.50851	0.263181	4.18e-06	0.000125781
COL4A5	-1.11159	5.33462	1.07e-08	3.73e-07			STAG3	-1.13346	1.22318	4.22e-06	0.00012662
C16orf89	-1.20969	1.98964	1.07e-08	3.76e-07			CHD6	-1.16706	5.79751	4.28e-06	0.000128402
MXD3	1.0609	4.62103	1.13e-08	3.95e-07			ZNF213	-1.02591	3.11856	4.5e-06	0.000133916
CRMP1	-2.35789	0.41671	1.14e-08	3.98e-07			KIF18B	-1.15193	2.23521	4.61e-06	0.000136686
CHD8	-1.26911	4.99901	1.15e-08	3.98e-07			PPP1R12B	-1.08333	3.21773	5.23e-06	0.000153699
LOC100288152	-1.18606	2.39778	1.15e-08	4.01e-07			TOX2	-1.15969	1.27227	5.33e-06	0.000156176
URB1	-1.00817	4.40937	1.17e-08	4.04e-07			TNRC6A	-1.17715	4.8537	5.35e-06	0.000156709
CNOT3	-1.02966	3.70517	1.19e-08	4.12e-07			LOC101927550	-2.08293	-0.371037	5.54e-06	0.000161675
GPR157	-1.50034	1.58286	1.19e-08	4.12e-07			C1orf226	-1.38277	0.980682	5.56e-06	0.000162206
ZNF628	-1.67704	1.81139	1.19e-08	4.12e-07			ZNF699	-1.31956	0.722978	5.63e-06	0.000164064
SEPN1	-1.11615	4.83229	1.25e-08	4.3e-07			BSN	-1.93954	0.0778329	5.71e-06	0.000165955
CCDC120	-1.1733	2.96515	1.28e-08	4.4e-07			QPCTL	-1.58435	0.690352	6.05e-06	0.000175606
PEX26	-1.05525	4.97421	1.29e-08	4.43e-07			ZNF121	-1.26729	2.96977	6.42e-06	0.000185426
KIAA1524	1.16153	3.29072	1.31e-08	4.47e-07			KIF13B	-1.02956	2.30118	6.44e-06	0.000185763
TRAK1	-1.00506	3.88285	1.31e-08	4.48e-07			MIR621	-4.06959	-2.11205	6.45e-06	0.00018598
CHD4	-1.02377	6.75441	1.35e-08	4.61e-07			LOC100130548	-2.67354	-1.28737	6.51e-06	0.00018745
PMS2CL	-1.24879	2.9223	1.36e-08	4.64e-07			PHACTR4	-1.35957	2.04801	6.55e-06	0.000188344
CDK12	-1.16635	5.0964	1.37e-08	4.68e-07			ATG14	-1.16305	2.03205	6.72e-06	0.00019296
PACSIN1	-1.00992	4.31677	1.41e-08	4.81e-07			CIT	-1.28842	2.17984	6.74e-06	0.000193243
PDDC1	-1.42478	3.22733	1.43e-08	4.85e-07			SNX29P2	-1.89732	-0.171365	6.75e-06	0.000193243
PITPNM2	-1.2821	1.96777	1.45e-08	4.92e-07			KCNQ1OT1	-1.45885	2.27341	6.83e-06	0.000195291
COBL	-1.17918	3.41579	1.47e-08	4.97e-07			SH3BP5-AS1	-1.51941	0.718864	7.07e-06	0.000201376
TJP2	-1.11796	4.31189	1.54e-08	5.18e-07			KIF21B	-1.31895	0.657692	7.47e-06	0.000211422
FRAS1	-1.86288	0.0531726	1.67e-08	5.64e-07			MLXIPL	-1.33821	0.768344	7.7e-06	0.00021781
DHRS2	1.1497	2.834	2.02e-08	6.74e-07			SLC6A16	-1.70075	-0.0342198	7.76e-06	0.000218732
THRSP	-1.42329	0.908178	2.02e-08	6.74e-07			ZKSCAN1	-1.03563	6.4555	7.99e-06	0.000224738
SETBP1	-1.6725	2.19922	2.1e-08	7e-07			CDK5RAP2	-1.23166	5.06694	8.09e-06	0.000227087
LINC00174	-1.77402	1.65678	2.12e-08	7.06e-07			CENPE	-2.58012	1.84022	8.28e-06	0.000231849
DNMT3A	-1.01684	4.04054	2.16e-08	7.17e-07			MAMLD1	-1.27727	0.468363	9.22e-06	0.000256361
PLEKHM1	-1.05602	3.88285	2.21e-08	7.31e-07			TSHZ3	-1.203	1.08859	9.27e-06	0.000257381
SON	-1.0432	6.80903	2.38e-08	7.85e-07			ACVR2B-AS1	-1.44955	0.136874	9.53e-06	0.00026303
SRGAP3	-1.25954	2.26668	2.44e-08	8.01e-07			SEMA6A	-1.17528	1.01742	1.01e-05	0.000276848
STK10	-1.07629	3.09254	2.46e-08	8.06e-07			KIF7	-2.59031	-1.43567	1.03e-05	0.000283198
BLM	1.43133	1.8799	2.63e-08	8.56e-07			GLI3	-1.19224	1.35331	1.06e-05	0.000289075
FAM155B	-1.12548	3.74337	2.77e-08	8.99e-07			LOC101928451	-2.06182	-0.59505	1.18e-05	0.000320353
ANKRD24	-1.71125	0.713232	2.8e-08	9.07e-07			ARHGAP31	-1.07723	2.64165	1.28e-05	0.000344102
HDAC7	-1.0107	4.39153	2.86e-08	9.25e-07			ZNF708	-1.465	1.73578	1.29e-05	0.000348247
TNRC6B	-1.09787	5.46749	3.17e-08	1.02e-06			KIAA1024	-1.3759	0.397958	1.42e-05	0.000379828
SRMS	-1.19389	2.44042	3.3e-08	1.06e-06			DFNB31	-1.06413	1.88286	1.43e-05	0.000379828
NR1D1	-1.32243	1.29126	3.36e-08	1.08e-06			MIR4461	-1.11943	4.7041	1.49e-05	0.000395656
HYI	-2.71708	-0.492634	3.43e-08	1.1e-06			MYCBP2	-1.19177	5.55054	1.5e-05	0.000396225
ZDHHC8	-1.11108	3.32867	3.6e-08	1.15e-06			LOC100132077	-1.64031	-0.0508044	1.5e-05	0.000396708
EME1	1.12826	2.52076	3.7e-08	1.18e-06			GOLGA2P5	-1.62044	1.46045	1.55e-05	0.000406749
MMP24	-1.2589	2.09436	3.73e-08	1.19e-06			LTB4R	-1.07988	1.25994	1.55e-05	0.000408402
CEP250	-1.63386	3.15239	4.23e-08	1.34e-06			IKZF4	-1.19217	1.28458	1.76e-05	0.000454169
CGN	-1.14148	3.74154	4.56e-08	1.44e-06			TPR	-1.9677	5.00173	2.01e-05	0.000510553
COL18A1	-1.18516	2.14243	4.59e-08	1.45e-06			SPEG	-1.2678	0.734005	2.02e-05	0.000514271
PROSER3	-2.24084	0.293147	5.82e-08	1.82e-06			AHRR	-1.2201	1.05389	2.07e-05	0.000525078
PLEKHG4	-1.04246	3.68126	5.94e-08	1.85e-06			C9orf173	-1.57113	-0.265892	2.08e-05	0.000527386
PITPNM3	-1.09599	2.36408	6.2e-08	1.93e-06			OPA3	-1.1058	2.05462	2.12e-05	0.000535234
LINC01521	-1.14751	2.23555	6.35e-08	1.97e-06			FRMPD3	-1.57044	0.0672325	2.13e-05	0.000538859
RBBP8NL	-1.22441	2.24966	6.39e-08	1.98e-06			C19orf71	-3.37655	-1.61142	2.28e-05	0.000571377
CCDC64	-1.01493	3.55204	6.43e-08	1.99e-06			UBAP1L	-1.79211	0.288482	2.29e-05	0.000573123
ATG9B	-1.11308	2.37638	6.49e-08	2.01e-06			MROH6	-1.38269	0.111773	2.33e-05	0.000582104
VHL	-1.18704	3.3546	6.7e-08	2.07e-06			SMG1	-1.02884	5.52439	2.47e-05	0.000614695
PGAM5	-1.1305	4.14197	6.81e-08	2.1e-06			SPTBN1	-1.8288	-0.522223	2.61e-05	0.000648172
MRGPRE	-2.20839	-0.70302	6.82e-08	2.1e-06			PARD6G	-1.06903	1.59008	2.63e-05	0.000651147
TTK	1.10309	3.53062	7.08e-08	2.17e-06			HIVEP2	-1.0657	3.52539	2.93e-05	0.000715557
SIM2	-1.08541	2.99055	7.46e-08	2.28e-06			MIR4292	-3.94222	-2.20643	3.25e-05	0.000786264
ARHGAP31	-1.32488	2.64165	7.67e-08	2.34e-06			FBXL19-AS1	-1.05921	1.21185	3.29e-05	0.000794188
MYO15B	-1.43616	2.2358	8.42e-08	2.55e-06			TSHZ2	-1.4997	-0.165131	3.58e-05	0.000854522
LCN2	-2.86934	-1.44282	8.63e-08	2.61e-06			RNF165	-1.6113	-0.213599	3.63e-05	0.000865003
RENBP	-1.22837	1.47053	9.17e-08	2.76e-06			HEG1	-1.08907	0.99317	3.92e-05	0.000928059
ATP1A3	-1.14613	1.92092	9.37e-08	2.82e-06			GAL3ST2	-5.99722	-2.44822	3.99e-05	0.00094287
C5orf34	1.2182	2.12815	9.59e-08	2.88e-06			ZNF37BP	-1.39247	1.99198	4.16e-05	0.000980381
ARTN	-1.03605	3.05814	9.72e-08	2.91e-06			NEB	-2.21473	-0.264278	4.36e-05	0.00102418
ANLN	1.1694	4.94565	1.02e-07	3.05e-06			JMJD7-PLA2G4B	-1.35486	0.17622	4.61e-05	0.00107932
UNC5A	-1.12465	2.60093	1.03e-07	3.07e-06			SLC24A1	-1.03193	2.89472	5.22e-05	0.00121376
PLEKHA7	-1.11958	2.83086	1.04e-07	3.11e-06			SCART1	-1.22987	0.358096	6.25e-05	0.00142097
SH3D21	-1.41691	1.09545	1.05e-07	3.12e-06			DST	-1.24984	3.03891	6.92e-05	0.00155301
NTN3	-1.44311	0.930796	1.05e-07	3.13e-06			ASB16	-2.31877	-1.11241	6.95e-05	0.00155922
TBKBP1	-1.01169	4.24173	1.12e-07	3.33e-06			LOC101927770	-1.54093	0.205228	7.01e-05	0.0015695
CDCA4	1.02821	4.82178	1.15e-07	3.4e-06			CLIP1	-1.33466	4.18434	7.26e-05	0.0016187
NOS1AP	-1.99007	0.0172242	1.16e-07	3.42e-06			HIVEP1	-1.2503	2.92117	7.42e-05	0.00164889
CACNB1	-1.1065	2.22456	1.26e-07	3.7e-06			LOC729218	-1.33614	0.0859239	8.34e-05	0.00182914
METTL7A	-1.00838	4.62604	1.48e-07	4.31e-06			BRCA2	-1.65684	3.17983	8.8e-05	0.00191766
MAGI1	-1.20209	4.25668	1.52e-07	4.41e-06			ADGRA2	-1.39764	-0.107928	9.65e-05	0.00208118
MIR4664	-2.0379	0.410626	1.55e-07	4.48e-06			ZNF500	-1.13914	2.3947	0.000101566	0.00218303
PINK1-AS	-2.47798	-0.550383	1.56e-07	4.51e-06			LINC01000	-3.0718	-1.37857	0.000102225	0.00219546
TOX2	-1.33675	1.27227	1.67e-07	4.83e-06			BDP1	-1.44055	5.86271	0.000108112	0.00229739
NES	-1.39446	2.78158	1.72e-07	4.93e-06			NPIPA1	-2.12989	-0.975898	0.00011465	0.00242604
HEATR3	-1.00577	3.44022	1.85e-07	5.28e-06			LINC00265	-2.64801	-1.47	0.000119948	0.0025264
LOC728763	-1.81891	-0.108821	1.89e-07	5.39e-06			CROCCP3	-2.34019	-1.3418	0.000124748	0.00261323
LRCH3	-1.13578	3.37478	2.03e-07	5.76e-06			TERT	-1.27562	-0.0247089	0.000125402	0.00262106
TLN2	-1.57888	1.06087	2.09e-07	5.91e-06			LOC441124	-1.50299	0.150729	0.000130182	0.00271265
USP42	-1.27825	3.00847	2.37e-07	6.61e-06			LRRC37A4P	-1.31267	2.28026	0.000131378	0.00272924
IPO5P1	-1.83974	0.848885	2.39e-07	6.66e-06			NTN3	-1.0498	0.930796	0.000136271	0.00282445
ADAMTSL4	-1.31181	1.34869	2.53e-07	7.03e-06			NIPBL	-1.63336	3.96342	0.00014447	0.00298455
ADCY3	-1.03822	2.69429	2.59e-07	7.18e-06			CA5B	-1.09149	1.24478	0.000149038	0.00306347
SIPA1L1	-1.025	4.33946	2.67e-07	7.39e-06			TAS1R3	-1.50412	-0.267588	0.00015423	0.0031583
LOC284600	-1.28314	1.96368	2.71e-07	7.5e-06			SLC9A3	-1.30949	0.0911948	0.000162706	0.003312
RNF165	-1.96843	-0.213599	2.73e-07	7.55e-06			MC1R	-1.53284	0.206855	0.000170607	0.00345222
DNMBP	-1.1935	1.65782	2.77e-07	7.64e-06			ZNF587	-1.08768	1.72139	0.000170799	0.00345357
GPRIN1	-1.05422	2.93894	2.79e-07	7.69e-06			TENM1	-1.26387	3.51088	0.00017367	0.00350641
PXDN	-1.01111	3.66088	2.84e-07	7.83e-06			KCTD21-AS1	-1.76091	-0.533253	0.000181397	0.00364087
KIRREL	-1.03937	2.382	2.97e-07	8.17e-06			SPATA32	-2.89321	-1.74017	0.000185802	0.00371835
CRAMP1L	-1.30908	1.98822	3e-07	8.23e-06			GRIK5	-1.46949	-0.407661	0.000186592	0.00373143
ARHGAP17	-1.01274	3.40753	3e-07	8.23e-06			PCDHGA4	-1.9723	-1.06584	0.000189239	0.00377606
NKD2	-1.1551	1.69654	3.02e-07	8.28e-06			MPHOSPH8	-1.32225	4.36336	0.000196361	0.00390107
SGOL1	1.63009	1.24217	3.05e-07	8.34e-06			FAM215A	-2.8001	-1.4713	0.000198216	0.00393506
PRSS1	-1.86027	-0.497737	3.08e-07	8.41e-06			BAZ2B	-1.37719	2.30653	0.000202805	0.00401157
HDAC4	-1.02631	2.31014	3.1e-07	8.45e-06			SNORD3B-1	1.08011	0.251323	0.000205437	0.00405594
SCUBE1	-1.32197	0.952361	3.29e-07	8.92e-06			ZNF417	-1.23326	0.364321	0.000207353	0.00406909
SNX29P2	-2.13281	-0.171365	3.35e-07	9.08e-06			CDH4	-3.14064	-1.97041	0.000218702	0.00426697
FBXL18	-1.13888	2.9677	3.36e-07	9.09e-06			ANKRD12	-1.68658	3.71625	0.000223011	0.00433893
MYRF	-1.21694	1.59592	3.42e-07	9.23e-06			ZNF829	-1.16952	0.801283	0.00023345	0.00451629
ZNF699	-1.47633	0.722978	3.72e-07	1e-05			MIR570	-2.83888	-1.4874	0.000234952	0.00453907
ZSWIM4	-1.22638	1.73865	3.77e-07	1.01e-05			ARMCX4	-1.35664	-0.291951	0.000239752	0.00462509
DUSP27	-1.59491	0.923454	3.79e-07	1.02e-05			PCDHGA12	-2.34301	-1.76595	0.000255966	0.00490615
MYH10	-1.55428	5.89014	3.8e-07	1.02e-05			NRXN2	-2.2706	-1.52638	0.000256018	0.00490615
TNC	-1.33836	1.4379	3.91e-07	1.05e-05			SATB2	-1.01454	1.14732	0.000269388	0.00512796
HTATSF1P2	-2.77532	-1.12694	3.95e-07	1.06e-05			CEP350	-1.40386	3.82352	0.00027587	0.00524039
LINC00669	1.49655	0.996597	4.18e-07	1.11e-05			PPFIA4	-1.19587	0.163234	0.000283309	0.00536303
TAF4	-1.10364	2.6072	4.25e-07	1.13e-05			CECR2	-1.01279	1.30247	0.000296771	0.00559073
S100P	-1.49035	1.67477	4.43e-07	1.17e-05			BEGAIN	-1.27476	0.154459	0.000301203	0.00566639
PLK4	1.09694	3.6971	4.47e-07	1.18e-05			COLQ	-1.50509	0.0345467	0.000303275	0.00569752
AUNIP	1.16843	1.88457	4.79e-07	1.27e-05			GNG13	-1.16825	0.269931	0.000304863	0.00572342
TIAF1	-2.44916	-0.225122	4.98e-07	1.31e-05			TTC34	-1.55473	-0.512322	0.000320393	0.00597796
CECR2	-1.38969	1.30247	5.11e-07	1.34e-05			FAM227A	-1.55405	-0.302729	0.000328284	0.00610019
ZNF587B	-1.47615	1.0636	5.13e-07	1.35e-05			LY6G5B	-5.81081	-2.60944	0.000328591	0.00610173
PGPEP1	-1.02113	4.62801	5.15e-07	1.35e-05			TRIM17	-2.23139	-1.25117	0.000366056	0.0067062
FAM20B	-1.19983	3.40071	5.17e-07	1.35e-05			ZC3H13	-1.35252	3.39138	0.00037552	0.00685657
FRMPD1	-1.2427	2.14605	5.23e-07	1.37e-05			ZNF329	-1.16166	1.02912	0.000390272	0.00707194
PRRC2C	-1.50275	4.08379	5.25e-07	1.37e-05			SYCP3	-2.17677	-1.69804	0.000390309	0.00707194
LOC200772	-1.08637	1.83482	5.33e-07	1.39e-05			PLCD4	-2.29525	-1.60817	0.00039971	0.0072162
SEMA4G	-1.57583	0.539731	5.42e-07	1.41e-05			CCDC27	-3.79377	-2.14336	0.000414799	0.007459
KIF13B	-1.143	2.30118	5.59e-07	1.45e-05			STARD9	-1.17924	0.882149	0.000421264	0.0075653
ZNF827	-1.06481	3.62516	5.93e-07	1.53e-05			LOC100507437	-1.0195	1.76074	0.000435415	0.00778868
SH3RF3	-1.46296	0.822856	6.15e-07	1.58e-05			CLCNKA	-1.30505	-0.314243	0.000444707	0.00792373
ZNF608	-1.39512	2.42241	7.01e-07	1.79e-05			ELFN1	-1.14243	0.084142	0.000449897	0.00800054
KIF21B	-1.46283	0.657692	7.38e-07	1.88e-05			C15orf62	-1.24131	-0.0383278	0.000453341	0.00805131
MDN1	-1.17188	3.37054	8.48e-07	2.15e-05			DZIP1L	-1.12735	-0.0652793	0.00045989	0.00815699
LOC440300	-1.75356	0.175247	8.97e-07	2.26e-05			LHX4	-1.28098	-0.19045	0.000466958	0.00826625
NSD1	-1.06594	6.54702	9.02e-07	2.27e-05			KIAA1614	-2.04744	-1.44919	0.00046741	0.00826888
NFATC1	-1.05718	2.59475	9.91e-07	2.49e-05			FLJ42627	-1.77482	-1.26942	0.000497188	0.00874761
MMACHC	-1.30014	2.09224	1.03e-06	2.58e-05			HTATSF1P2	-2.13223	-1.12694	0.000497355	0.00874761
FAM111B	1.48376	5.11931	1.05e-06	2.61e-05			CUBN	-2.94293	-2.2378	0.000508052	0.00892426
GOLGA2	-1.07639	4.77441	1.05e-06	2.62e-05			ARAP3	-1.05458	0.922634	0.000519347	0.00908758
BPTF	-1.68106	4.33146	1.07e-06	2.66e-05			LOC100288123	-2.84064	-1.89114	0.000525959	0.00919634
MAMDC4	-1.36406	0.814558	1.2e-06	2.97e-05			GOLGA4	-1.45705	2.43126	0.000535536	0.00934091
PLEKHM1P	-1.20651	1.42299	1.28e-06	3.16e-05			CSPG4	-5.61776	-2.52475	0.000568365	0.00983809
DDIAS	1.13921	2.97455	1.3e-06	3.19e-05			NIN	-1.1189	4.39759	0.000576688	0.0099569
CDCA2	1.0366	3.99237	1.31e-06	3.21e-05			SARNP	-1.05258	1.19116	0.00057854	0.00998255
ARHGEF5	-1.1734	2.44217	1.42e-06	3.45e-05
DIAPH3	1.0297	3.6426	1.46e-06	3.54e-05
CRIPAK	-1.12729	1.5739	1.46e-06	3.54e-05
PKMYT1	1.08737	4.05555	1.49e-06	3.6e-05
FAM229A	-1.66403	0.369724	1.49e-06	3.6e-05
SEMA3G	-1.0579	2.32933	1.49e-06	3.6e-05
PRKAR2A	-1.22168	4.03634	1.57e-06	3.78e-05
LINC00675	1.27465	0.93695	1.72e-06	4.11e-05
AHR	-1.49047	1.49206	1.81e-06	4.31e-05
CNTN2	-1.31219	0.98568	1.87e-06	4.42e-05
NCOR1	-1.42617	5.59981	1.88e-06	4.45e-05
NPIPB3	-2.50555	-0.637024	2.1e-06	4.9e-05
APOL6	-2.42937	0.463614	2.12e-06	4.95e-05
OTUD7A	-1.46267	0.26826	2.49e-06	5.76e-05
TNRC6C-AS1	-1.07915	1.64923	2.5e-06	5.76e-05
KLHDC8A	-1.28181	0.604408	2.51e-06	5.79e-05
MAP3K14	-1.21455	1.58306	2.53e-06	5.83e-05
LAMP3	-2.67201	-1.60429	2.82e-06	6.46e-05
KIF23	1.12212	3.87761	3.17e-06	7.16e-05
MIR570	-3.23819	-1.4874	3.21e-06	7.24e-05
ZNF213	-1.04559	3.11856	3.22e-06	7.27e-05
SCAF4	-1.07275	2.40736	3.32e-06	7.47e-05
C10orf91	-2.25989	-0.532964	3.37e-06	7.55e-05
TMEM131	-1.1221	3.81841	3.41e-06	7.63e-05
ANK2	-2.93646	-1.66932	3.5e-06	7.82e-05
GON4L	-1.07797	3.81833	3.58e-06	7.99e-05
KLHL29	-1.17186	1.4162	3.59e-06	7.99e-05
RASGEF1B	2.27646	-0.846323	3.59e-06	7.99e-05
CASP10	-1.21811	0.890961	3.69e-06	8.2e-05
CCDC183-AS1	-1.21046	0.924594	3.7e-06	8.2e-05
PER1	-1.05241	2.16984	3.78e-06	8.39e-05
MLXIPL	-1.38316	0.768344	3.83e-06	8.46e-05
ZNF579	-1.16072	2.06724	3.83e-06	8.47e-05
KIAA1462	-1.04358	2.18272	3.86e-06	8.5e-05
DFNB31	-1.13768	1.88286	4.03e-06	8.83e-05
SOBP	-1.24977	1.16781	4.31e-06	9.39e-05
LOC101927550	-2.11191	-0.371037	4.73e-06	0.000102832
GK5	-1.36439	2.09172	4.89e-06	0.000105843
C16orf96	-1.96914	-0.568132	4.93e-06	0.000106804
C1orf226	-1.40101	0.980682	5.42e-06	0.000116802
PDP2	-1.06199	2.84607	5.58e-06	0.000119808
E2F8	1.01602	2.10673	5.87e-06	0.000125886
HRK	-2.12186	-0.965232	6.41e-06	0.000136514
METTL16	-1.07993	4.03673	6.61e-06	0.000140481
SLC24A1	-1.14915	2.89472	6.75e-06	0.000142949
KAT6A	-1.10388	4.62873	6.79e-06	0.000143743
ZNF503	-1.01598	2.3381	6.92e-06	0.000145888
SLC30A2	-1.20656	0.748913	7.04e-06	0.000148236
LRP5L	-1.04536	1.63903	7.25e-06	0.000152261
LTB4R	-1.12226	1.25994	7.91e-06	0.000164665
SNORD3B-1	1.37454	0.251323	8.05e-06	0.000167227
ZMYND8	-1.23786	3.91001	8.18e-06	0.000169594
QPCTL	-1.58056	0.690352	8.5e-06	0.000175168
C1orf145	-1.21219	0.876357	8.8e-06	0.00018093
PRR11	-1.74813	1.3172	9.55e-06	0.000195438
SATB2	-1.22237	1.14732	1.02e-05	0.00020729
LOC101927318	1.28365	0.460915	1.04e-05	0.000211359
LINC01000	-3.26094	-1.37857	1.34e-05	0.000263507
KMT2C	-1.12932	5.99206	1.37e-05	0.000269179
C19orf71	-3.51929	-1.61142	1.38e-05	0.000269629
EIF4G3	-1.20276	4.6482	1.39e-05	0.00027216
SDK2	-1.6031	0.419903	1.4e-05	0.000274234
RNF208	-1.00761	3.48444	1.45e-05	0.000282033
LOC101928451	-2.06498	-0.59505	1.46e-05	0.000284656
LOC100507373	-1.76243	-0.217678	1.51e-05	0.000292317
PRR15	-1.11929	1.21354	1.58e-05	0.000305571
TRIM66	-1.00498	2.14014	1.63e-05	0.000313648
ADRB1	-1.04859	1.21077	1.64e-05	0.000315972
RAPH1	-1.0679	1.6972	1.77e-05	0.000337927
CYP1B1	-1.11857	0.986523	1.87e-05	0.000356944
GRIN1	-1.13701	1.95846	1.89e-05	0.000360653
ZNF329	-1.39559	1.02912	1.94e-05	0.000368125
S100A14	-1.55037	-0.578682	2.1e-05	0.000397071
IKZF4	-1.19278	1.28458	2.11e-05	0.00039995
VWA7	-1.24577	1.03062	2.12e-05	0.000401336
PPFIA4	-1.39969	0.163234	2.24e-05	0.000419639
PLA2G3	-1.15699	0.876912	2.25e-05	0.000422094
PABPC1L	-1.20947	2.62496	2.45e-05	0.000455864
ZFP30	-1.64607	1.20552	2.5e-05	0.00046337
PLCG2	-1.04109	1.75999	2.58e-05	0.000475715
C1RL-AS1	-1.08375	1.71967	2.67e-05	0.0004913
C22orf46	-1.3164	3.40658	2.67e-05	0.0004913
MASP2	-1.97119	-0.466137	2.68e-05	0.000491648
TNFAIP8L1	-1.25077	0.609233	2.77e-05	0.000506022
PDE2A	-1.63906	-0.546715	3.03e-05	0.000551415
CCDC144B	-1.94153	0.0641941	3.04e-05	0.000551415
LRRC16B	-1.80021	-0.521229	3.04e-05	0.000552262
PDXDC2P	-1.98627	-0.45715	3.09e-05	0.000560263
RNF125	-1.38022	0.163439	3.18e-05	0.00057413
ZFHX4	-1.32124	3.20037	3.42e-05	0.000613649
CA5B	-1.19936	1.24478	3.46e-05	0.000619718
FBXL19-AS1	-1.06268	1.21185	3.67e-05	0.00065517
GNG13	-1.30978	0.269931	3.83e-05	0.000682422
GOLGB1	-1.96071	5.07987	4.05e-05	0.000718717
SETD2	-1.31223	3.23629	4.08e-05	0.00072116
LINC00957	-1.30707	1.76081	4.16e-05	0.000735258
NHSL2	-1.40209	-0.0223452	4.19e-05	0.000739599
TMEM132B	-2.2474	-1.35476	4.21e-05	0.000742565
LOC100132077	-1.58399	-0.0508044	4.26e-05	0.000749906
HEG1	-1.08829	0.99317	4.3e-05	0.000755557
FIBIN	-3.35466	-2.33371	4.31e-05	0.000756504
LAMB3	-1.60305	-0.636928	4.33e-05	0.000758827
TRIM17	-2.43652	-1.25117	4.38e-05	0.000766154
SYCE2	1.12277	1.44093	4.58e-05	0.000796728
CHD7	-1.31383	1.81699	4.79e-05	0.000829193
TNRC6A	-1.0476	4.8537	5.05e-05	0.000868972
CLSPN	1.28034	2.85884	5.58e-05	0.000952239
MIR3648-1	-2.31607	0.0953608	5.85e-05	0.000995415
KIAA1211L	-1.96802	-0.914514	6.06e-05	0.00102962
ADGRB1	-1.13138	0.517868	6.28e-05	0.00106158
PAGE4	1.04962	0.915016	6.51e-05	0.00109458
BEGAIN	-1.38961	0.154459	7.35e-05	0.00122864
SPRY4	1.64257	-0.59633	7.88e-05	0.00130196
SNORD3B-1	1.37454	0.251323	8.05e-06	0.000167227
HIVEP2	-1.00638	3.52539	8.03e-05	0.00132314
ADGRA2	-1.42197	-0.107928	8.31e-05	0.00136577
LOC285629	-1.71648	-1.22932	8.49e-05	0.00139059
SCARF1	-1.20045	0.489316	8.63e-05	0.0014113
PHACTR4	-1.19612	2.04801	8.72e-05	0.00142536
HIST1H4C	1.05873	2.36719	9.21e-05	0.00149993
LOC729218	-1.36626	0.0859239	9.23e-05	0.00150018
LINC00265	-2.65698	-1.47	9.71e-05	0.00156849
ADRA2A	-1.10509	0.60175	9.74e-05	0.00157254
TGM1	-1.15077	0.167099	0.000103961	0.00167128
RPRML	1.30997	0.179175	0.00010547	0.00169155
ZNF500	-1.14062	2.3947	0.000109523	0.00175243
BSN	-1.69901	0.0778329	0.000114104	0.00181933
SPEG	-1.17777	0.734005	0.000120237	0.00190931
OPA3	-1.00268	2.05462	0.000127611	0.00201475
STX1B	-1.6831	-0.850681	0.000127615	0.00201475
LOC729603	-1.28926	0.104903	0.000129889	0.00204474
MC1R	-1.58077	0.206855	0.00013436	0.00210899
LOC100130548	-2.40447	-1.28737	0.000144051	0.00223038
FUT3	-1.8946	-1.21604	0.0001477	0.0022817
HIC1	-5.79622	-2.08173	0.000153025	0.00235331
C1QTNF2	1.47387	-0.501103	0.000161249	0.00246038
CD22	-1.63553	-0.887993	0.00016683	0.00253561
HOXA6	-1.38523	-0.0744775	0.000172799	0.00261758
ASB16	-2.19605	-1.11241	0.000182399	0.00275384
KAT6B	-1.0993	4.02019	0.00018998	0.00285409
LOC101927770	-1.47858	0.205228	0.000193803	0.00290673
FST	-3.16643	-2.17038	0.000202735	0.00302904
MCAM	-1.49649	-0.649427	0.000214856	0.00319615
SERPIND1	1.18322	0.430229	0.000236324	0.0034776
FZD8	-1.15959	0.328104	0.000236756	0.00348207
ASH1L	-1.1044	5.17867	0.000243462	0.00356533
UBAP1L	-1.59306	0.288482	0.000248341	0.00362706
ARAP3	-1.11664	0.922634	0.00026814	0.00387476
GCG	1.17453	0.17502	0.000271398	0.00391561
CCDC173	1.42699	0.0941163	0.000273718	0.00394283
ZNF121	-1.02275	2.96977	0.000281229	0.00403188
FAM189A1	-1.36779	-0.213205	0.000291758	0.00416534
HCN2	-1.2639	0.94682	0.000294524	0.00418949
GLI3	-1.00134	1.35331	0.000297651	0.00422955
STAT6	-1.11513	0.458129	0.000321403	0.00453168
ARHGAP21	-1.16633	3.7813	0.000330443	0.00463759
SCART1	-1.13029	0.358096	0.000345093	0.00481349
TRABD2B	-1.21212	-0.0169205	0.000346611	0.00482973
SPTB	-1.35044	-0.239282	0.000348862	0.00485044
UTRN	-1.29247	4.89187	0.000348986	0.00485044
SYNE1	-1.16463	1.06105	0.000365346	0.00504189
ARHGEF28	-1.00588	1.00119	0.000372842	0.00513174
LOC100507437	-1.03215	1.76074	0.00038805	0.00530426
CYP7A1	1.91988	-1.20094	0.000388309	0.00530514
HDAC9	-2.63625	-2.23271	0.000400556	0.00545607
XIRP2	-3.09573	-2.37095	0.000406566	0.00552141
LINC01123	-1.59106	-0.915748	0.000408477	0.00554185
SSTR5-AS1	-1.03693	0.916294	0.000442078	0.00593284
KANK4	-1.62068	-1.04886	0.000450121	0.00602892
MYOF	-1.20001	0.373725	0.00045538	0.00608742
SLC6A16	-1.39346	-0.0342198	0.000456268	0.0060963
FOXN1	-2.63513	-2.02151	0.000463259	0.00617159
LINC00229	1.75306	-1.20005	0.000528891	0.00693619
LRP4	-1.02172	0.732696	0.000541555	0.00706637
MST1	-1.10983	0.872774	0.000550779	0.00716914
C1orf158	-2.94858	-2.5619	0.000555606	0.00722209
LOC101929823	-5.57579	-2.56537	0.000589745	0.00762951
CSF2RB	-3.54071	-2.44535	0.000602268	0.0077731
C6orf223	-5.78533	-2.9916	0.000604386	0.00779674
HYAL1	-1.02088	0.306568	0.000631404	0.00809556
LOC101927487	-1.9151	0.00853251	0.000639731	0.00816779
SPTBN1	-1.52812	-0.522223	0.000645027	0.00822689
LOC102723809	-5.57494	-2.93782	0.000646736	0.00824181
SARNP	-1.03496	1.19116	0.000656997	0.00834918
ELFN1	-1.15349	0.084142	0.000660547	0.00837905
TAF3	-1.03097	1.78838	0.000674106	0.00853481
GLUD1P3	-1.25917	0.0614318	0.000753339	0.00942792
PIP5K1B	-2.36993	-2.04337	0.000758672	0.00946936
MROH6	-1.16163	0.111773	0.000764191	0.00952952
ALK	-1.35346	-0.775296	0.000768758	0.0095741
ALMS1	-1.23121	2.46898	0.000768818	0.0095741
SLFN13	1.36078	-0.26483	0.000791916	0.00982318
